# Supplementary material for: Transition metal-free oxidative esterification of benzylic alcohols in aqueous medium
Source: Royal Society of Chemistry journal article supplement (doi:10.1039/c4ob01524j), 2014-09-26
Supplement: c4ob01524j1.pdf [file c4ob01524j1.pdf]

## Supporting Information

### Transition metal-free oxidative esterification of benzylic alcohols in aqueous medium

Supravat Samanta,<sup>a</sup> Venkatanarayana Pappula<sup>a</sup>, Milan Dinda<sup>a</sup>, and Subbarayappa Adimurthy\*

<sup>a</sup>*Academy of Scientific & Innovative Research, CSIR–Central Salt & Marine Chemicals  
Research Institute, G.B. Marg, Bhavnagar-364 002. Gujarat (INDIA)*

**Table of Contents:**

|                                                                                                 |                  |
|-------------------------------------------------------------------------------------------------|------------------|
| <b>General Experimental section</b>                                                             | <b>S3</b>        |
| <b>Characterization of all Products</b>                                                         | <b>S4 – S12</b>  |
| <b>Copies of <math>^1\text{H}</math> &amp; <math>^{13}\text{C}</math>- NMR for all products</b> | <b>S12 – S41</b> |
| <b>UV spectra data of benzyl alcohol, benzaldehyde<br/>&amp; methylbenzoate</b>                 | <b>S42</b>       |

## Experimental Section:

**General:** All commercially available chemicals and reagents were used without any further purification unless otherwise indicated.  $^1\text{H}$  and  $^{13}\text{C}$  NMR spectra were recorded at 200 and 50 MHz, respectively. The spectra were recorded in  $\text{CDCl}_3$  as solvent. Multiplicity was indicated as follows: s (singlet); d (doublet); t (triplet); m (multiplet); dd (doublet of doublets), etc. and coupling constants ( $J$ ) were given in Hz. Chemical shifts are reported in ppm relative to TMS as an internal standard. The peaks around delta values of  $^1\text{H}$  NMR (7.26), and  $^{13}\text{C}$  NMR (77.0) are correspond to deuterated solvent  $\text{CDCl}_3$ . Progress of the reactions was monitored by thin layer chromatography (TLC). All products were purified through column chromatography using silica gel 100-200 mesh size using ethyl acetate /hexane as eluent. All starting materials are commercially available and used without any further purification.

**A typical experimental procedure for the synthesis methyl benzoate (3a):** In a 25 mL glass vial, 108 mg (1.0 mmol) of Benzyl alcohol (**1a**), 2 mL of methanol (**2a**) and 0.2 mmol of HBr (46% aqueous solution) were taken and the vial closed with rubber septum with magnetic stir bar. Then the vial was heated to  $60^\circ\text{C}$  under stirring and initially 2.0 mmol of hydrogen peroxide (33% aqueous solution) was added through a syringe. The rest of the 4.0 mmol of hydrogen peroxide was added to the reaction mixture at an interval of 2 h. After complete addition of hydrogen peroxide the reaction was continued up to 16 h (the progress of the reaction was monitored by TLC). [In case of butanol, octanol and polyalcohols reaction temperature was  $70\text{--}75^\circ\text{C}$ ]. After completion of the reaction, the mixture was neutralised by aqueous solution of  $\text{NaHCO}_3$  (5%) and extracted with ethyl acetate (3x 10 mL) and dried with anhydrous sodium sulphate. Removal of the solvent under reduced pressure, the crude product left out was purified by column chromatography on silica gel (100-200 mesh) using ethyl acetate/ hexane and **3a** was obtained in (0.117 g) 86% yield. The spectroscopic data was in good agreement with the literature.<sup>1</sup> ( $^1\text{H}$  NMR (200 MHz,  $\text{CDCl}_3$ ):  $\delta$  8.02 – 7.97 (m, 2H), 7.47 (d,  $J = 7.4$  Hz, 1H), 7.39 - 7.32 (m, 2H), 3.83 (s, 3H);  $^{13}\text{C}$  NMR (50 MHz,  $\text{CDCl}_3$ ): 166.7, 132.6, 130.4, 129.4, 128.8, 128.1, 51.7).

**Methyl 4-chlorobenzoate (3b)<sup>1</sup>:**

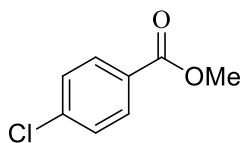

Yield (0.145g, 85%); <sup>1</sup>H NMR (200 MHz, CDCl<sub>3</sub>): δ 7.94 (d, *J* = 8.6 Hz, 2H), 7.37 (d, *J* = 8.6 Hz, 2H), 3.87 (s, 3H); <sup>13</sup>C NMR (50 MHz, CDCl<sub>3</sub>): 166.1, 139.3, 130.9, 128.6, 52.1.

**Methyl 4-bromobenzoate (3c)<sup>1</sup>:**

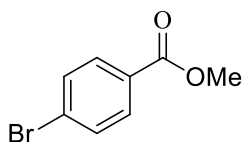

Yield (0.198g, 92%); <sup>1</sup>H NMR (200 MHz, CDCl<sub>3</sub>): δ 7.87(d, *J* = 8.6 Hz, 2H), 7.55(d, *J* = 8.6 Hz, 2H), 3.87 (s, 3H) <sup>13</sup>C NMR (50 MHz, CDCl<sub>3</sub>): 165.7, 131.9, 131.1, 130.6, 128.5, 127.5, 51.2 .

**Methyl 4-methylbenzoate (3d)<sup>1</sup>:**

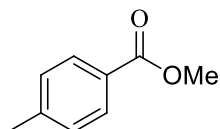

Yield (0.106g, 71%); <sup>1</sup>H NMR (200 MHz, CDCl<sub>3</sub>): δ 7.94 (d, *J* = 8.2 Hz, 2H), 7.24 (d, *J* = 8.0 Hz, 2H), 3.88(s, 3H), 2.39(s, 3H); <sup>13</sup>C NMR (50 MHz, CDCl<sub>3</sub>): 167.1, 143.4, 129.5, 129.0, 127.3, 51.8, 21.5.

**Methyl 4-nitrobenzoate (3e)<sup>2</sup>:**

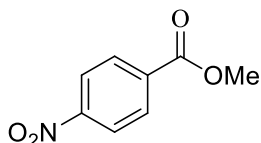

Yield (0.150g, 83%); <sup>1</sup>H NMR (200 MHz, CDCl<sub>3</sub>): δ 8.262 – 8.13 (m, 4H), 3.94 (s, 3H); <sup>13</sup>C NMR (50 MHz, CDCl<sub>3</sub>): 165.1, 150.5, 135.4, 130.6, 123.5, 52.8.

**Methyl 3-fluorobenzoate (3f)<sup>1</sup>:**

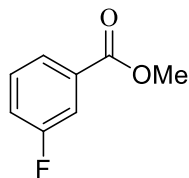

Yield (0.112g, 73%); <sup>1</sup>H NMR (200 MHz, CDCl<sub>3</sub>): δ 7.83 (d, *J* = 7.6 Hz, 1H), 7.72 (d, *J* = 9.2 Hz, 1H), 7.45 – 7.34 (m, 1H), 7.28 – 7.19 (m, 1H), 3.91 (s, 3H); <sup>13</sup>C NMR (50 MHz, CDCl<sub>3</sub>): 165.7, 164.9, 160.0, 132.3, 132.1, 130.0, 129.8, 125.2, 120.0, 119.61, 116.5, 52.2.

**Methyl 3-nitrobenzoate (3g)<sup>2</sup>:**

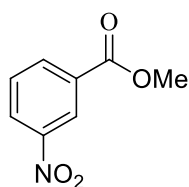

Yield (0.130g, 72%); <sup>1</sup>H NMR (200 MHz, CDCl<sub>3</sub>): δ 8.76 (s, 1H), 8.37 – 8.28 (m, 2H), 7.65 – 7.50 (m, 2H), 3.93 (s, 3H); <sup>13</sup>C NMR (50 MHz, CDCl<sub>3</sub>): 164.7, 148.1, 135.1, 131.7, 129.5, 127.2, 124.3, 52.6.

**Methyl 3-chlorobenzoate(3h)<sup>2</sup>:**

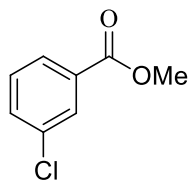

Yield (0.134g, 79%); <sup>1</sup>H NMR (200 MHz, CDCl<sub>3</sub>): δ 7.97 (s, 1H), 7.90 (d, *J* = 7.6 Hz, 1H), 7.48 – 7.45 (m, 1H), 7.38 – 7.30 (m, 1H), 3.89 (s, 3H); <sup>13</sup>C NMR (50 MHz, CDCl<sub>3</sub>): 165.7, 134.3, 132.8, 131.8, 129.6, 127.6, 52.3.

**Methyl 3-bromobenzoate (3i)<sup>2</sup>:**

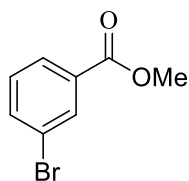

Yield (0.176g, 82%);  $^1\text{H}$  NMR (200 MHz,  $\text{CDCl}_3$ ):  $\delta$  8.15 (s, 1H), 7.98 (m, 1H), 7.68 (d,  $J = 8.0$  Hz, 1H), 7.37 - 7.30 (m, 1H), 3.91 (s, 3H);  $^{13}\text{C}$  NMR (50 MHz,  $\text{CDCl}_3$ ): 165.5, 135.7, 132.4, 132.1, 129.8, 128.0, 122.3, 52.2.

**Ethyl benzoate (3j)<sup>3</sup>:**

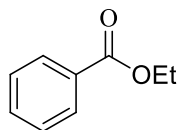

Yield (0.126g, 84%);  $^1\text{H}$  NMR (200 MHz,  $\text{CDCl}_3$ ):  $\delta$  7.94 – 7.90 (m, 2H), 7.45 (d,  $J = 7.6$  Hz, 1H), 7.38 - 7.29 (m, 2H), 4.30 – 4.19 (m, 2H), 1.30 – 1.22(m, 3H);  $^{13}\text{C}$  NMR (50 MHz,  $\text{CDCl}_3$ ): 166.4, 132.6, 130.4, 129.4, 128.8, 128.1, 60.8, 14.1.

**Ethyl 4-bromobenzoate (3k)<sup>4</sup>:**

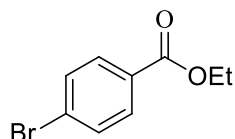

Yield (0.204g, 89%);  $^1\text{H}$  NMR (200 MHz,  $\text{CDCl}_3$ ):  $\delta$  7.86 (d,  $J = 8.6$  Hz, 3H), 7.52 (d,  $J = 8.4$  Hz, 2H), 4.37 - 4.27 (m, 2H), 1.37 – 1.30 (m, 3H);  $^{13}\text{C}$  NMR (50 MHz,  $\text{CDCl}_3$ ): 165.6, 131.4, 130.9, 129.2, 127.7, 61.0, 14.1.

**Ethyl 4-methylbenzoate (3l)<sup>5</sup>:**

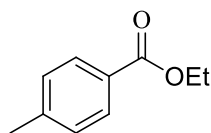

Yield (0.113g, 69%);  $^1\text{H}$  NMR (200 MHz,  $\text{CDCl}_3$ ):  $\delta$  7.96 (d,  $J = 8.0$  Hz, 2H), 7.26 (d,  $J = 8.4$  Hz, 2H), 4.42 – 4.32 (m, 2H), 2.41(s, 3H), 1.43 – 1.36 (m, 3H);  $^{13}\text{C}$  NMR (50 MHz,  $\text{CDCl}_3$ ): 167.2, 143.5, 129.1, 127.5, 60.2, 21.6, 14.1 .

**Ethyl 4-chlorobenzoate (3m)<sup>5</sup>:**

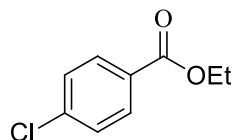

Yield (0.149g, 81%);  $^1\text{H}$  NMR (200 MHz,  $\text{CDCl}_3$ ):  $\delta$  8.00 (d,  $J = 8.4$  Hz, 2H), 7.42 (d,  $J = 8.4$  Hz, 2H), 4.42 – 4.32 (m, 2H), 1.42 – 1.35 (m, 3H);  $^{13}\text{C}$  NMR (50 MHz,  $\text{CDCl}_3$ ): 165.7, 132.2, 130.9, 128.6, 61.2, 14.3.

**Butyl benzoate (3n)<sup>6</sup>:**

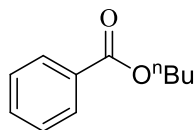

Yield (0.142g, 80%);  $^1\text{H}$  NMR (200 MHz,  $\text{CDCl}_3$ ):  $\delta$  8.06 (d,  $J = 7.2$  Hz, 2H), 7.58 -7.51 (m, 1H), 7.42-7.39 (m, 2H), 4.36 (t,  $J = 6.6$  Hz, 2H), 1.82 – 1.68 (m, 2H), 1.57 – 1.39 (m, 2H), 1.01 – 0.94 (m, 3H);  $^{13}\text{C}$  NMR (50 MHz,  $\text{CDCl}_3$ ): 165.8, 131.6, 131.0, 129.3, 127.8, 65.0, 30.6, 19.1, 13.7.

**Butyl 4-methylbenzoate (3o)<sup>6</sup>:**

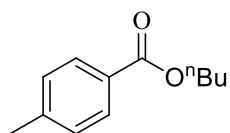

Yield (0.131g, 68%);  $^1\text{H}$  NMR (200 MHz,  $\text{CDCl}_3$ ):  $\delta$  7.95 (d,  $J = 8.0$ , 2H), 7.24 (d,  $J = 8.0$  Hz, 2H), 4.33 (t,  $J = 6.4$ , 2H), 2.40 (s, 3H), 1.78 – 1.63 (m, 2H), 1.52 – 1.41 (m, 2H), 1.01 – 0.94 (m, 3H);  $^{13}\text{C}$  NMR (50 MHz,  $\text{CDCl}_3$ ): 166.7, 143.4, 129.5, 129.0, 127.8, 64.6, 30.8, 21.6, 19.2, 13.7.

**Butyl 4-chlorobenzoate (3p)<sup>6</sup>:**

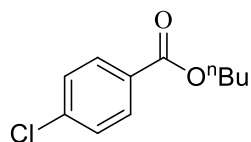

Yield (0.168g, 79%);  $^1\text{H}$  NMR (200 MHz,  $\text{CDCl}_3$ ):  $\delta$  7.97 – 7.93 (m, 2H), 7.38 – 7.34 (m, 2H), 4.33 (t,  $J = 6.4$  Hz, 2H), 1.79 – 1.66 (m, 2H), 1.54 – 1.36 (m, 2H), 1.00 – 0.92 (m, 3H);  $^{13}\text{C}$  NMR (50 MHz,  $\text{CDCl}_3$ ): 165.5, 139.1, 130.8, 128.9, 128.5, 64.9, 30.7, 19.2, 13.6.

**Butyl 4-bromobenzoate (3q)<sup>3</sup>:**

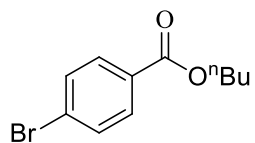

Yield (0.207g, 85%) ; <sup>1</sup>H NMR (200 MHz, CDCl<sub>3</sub>) : δ 7.90 (d, *J* = 8.6 Hz, 2H ), 7.57 (d, *J* = 8.4 Hz, 2H ), 4.33 (t, *J* = 6.4 Hz, 2H), 1.80 – 1.66 ( m, 2H), 1.54 – 1.36 (m, 2H), 0.99 – 0.92 (m, 3H); <sup>13</sup>C NMR (50 MHz, CDCl<sub>3</sub>): 166.6, 132.7, 130.5, 129.5, 128.3, 64.8, 30.7, 19.2, 13.7 .

**Octyl benzoate (3r)<sup>7</sup>:**

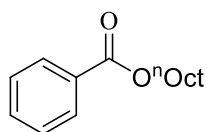

Yield (0.178 g, 76%) ; <sup>1</sup>H NMR (200 MHz, CDCl<sub>3</sub>) δ 8.04 – 8.00 (m , 2H ), 7.53 – 7.49 (m, 1H ), 7.44 – 7.37(m, 2H), 4.32 (t, *J* = 6.6 Hz, 2H), 1.79 – 1.65 ( m, 2H), 1.42 – 1.25 (m, 2H), 0.87– 0.81 (m, 3H); <sup>13</sup>C NMR (50 MHz, , CDCl<sub>3</sub>): 166.6, 132.7, 129.5, 128.3, 64.3, 31.7, 29.2, 28.9, 26.0, 22.6, 14.0 .

**Octyl 4-methylbenzoate (3s)<sup>8</sup>:**

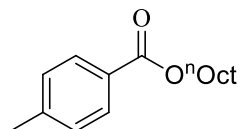

Yield (0.161g, 65%); ; <sup>1</sup>H NMR (200 MHz, CDCl<sub>3</sub>) : δ 7.87 (d, *J* = 8.0Hz , 2H), 7.19 –7.12 (m, , 2H), 4.24 (t, *J* = 6.6 Hz, 2H ), 2.32 (s , 3H) 1.79 – 1.65 (m, 2H), 1.42 –1.25 (m, 10H), 0.87 – 0.81 (m, 3H); <sup>13</sup>C NMR (50 MHz, CDCl<sub>3</sub>): 166.7, 143.3, 129.5, 128.9, 127.8, 64.4, 31.7, 29.1, 25.9, 25.0, 22.5, 14.0 .

**Octyl 4-chlorobenzoate (3t)<sup>3</sup>:**

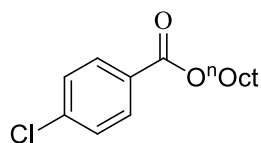



Yield (0.207g,77%) ;  $^1\text{H NMR}$  (200 MHz,  $\text{CDCl}_3$ ) :  $\delta$  7.97 (d,  $J = 8.4$  Hz , 2H) 7.39 (d,  $J = 8.6$  Hz, 2H), 4.31 (t,  $J = 6.6$  Hz, 2H ), 1.80 – 1.67 (m, 2H), 1.43-1.26 (m, 10H), 0.88 – 0.82 (m, 3H);  $^{13}\text{C NMR}$  (50 MHz,  $\text{CDCl}_3$ ): 165.7, 139.2, 130.9, 128.9, 128.6, 65.3, 31.7, 29.2, 28.6, 26.0, 22.6, 14.0 .

**Octyl 4-bromobenzoate (3u):**

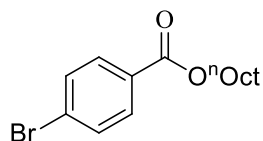

Yield (0.250g,80%) ;  $^1\text{H NMR}$  (200 MHz,  $\text{CDCl}_3$ ) :  $\delta$  7.88 (d,  $J = 8.4$  Hz , 2H), 7.54 (d,  $J = 8.4$  Hz, 2H), 4.30 (t,  $J = 6.6$  Hz, 2H ), 1.80 – 1.66 (m, 2H), 1.44-1.27 (m, 10H), 0.88 – 0.83 (m, 3H);  $^{13}\text{C NMR}$  (50 MHz, ,  $\text{CDCl}_3$ ): 165.7, 131.6, 131.0, 127.8, 64.2, 31.3, 29.1, 26.0, 25.0, 22.6, 14.0 . LRMS- calculated for  $\text{C}_{15}\text{H}_{22}\text{BrO}_2 = 313.0803$ ; found 313.0847

**Methyl thiophene-2-carboxylate (3v)<sup>1</sup>:**

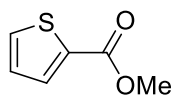

Yield (0.092g, 65%) ;  $^1\text{H NMR}$  (200 MHz,  $\text{CDCl}_3$ ) :  $\delta$  7.82 – 7.81 (m , 1H ), 7.57 – 7.55 (m,1H) , 7.13 – 7.09 ( m, 1H ), 3.88 (s, 3H ) ;  $^{13}\text{C NMR}$  (50 MHz, ,  $\text{CDCl}_3$ ): 162.7, 133.4, 132.3, 127.7, 52.1

**2,3-Dihydroxypropyl benzoate (5a)<sup>9</sup>:**

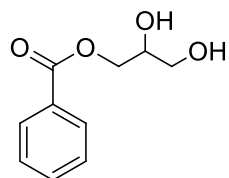

Yield (0.147g, 75%) ;  $^1\text{H NMR}$  (200 MHz,  $\text{CDCl}_3$ ) :  $\delta$  8.0 ( d,  $J = 7.4$  Hz, 2H ), 7.50 – 7.40 (m, 1H ), 7.36 ( d,  $J = 6.8$  Hz, 2H ), 4.34 (d,  $J = 6.8$  Hz, 2H ), 4.03 - 3.64 (m, 4H ) ;  $^{13}\text{C NMR}$  (50 MHz, ,  $\text{CDCl}_3$ ): 167.0, 133.3, 129.7, 128.4, 70.3, 65.6, 63.4 .

**2,3-Dihydroxypropyl 4-bromobenzoate (5b):**

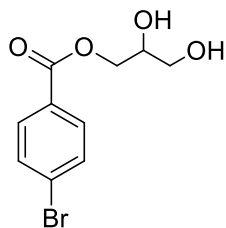

Yield (0.231g, 84%) ;  $^1\text{H NMR}$  (200 MHz,  $\text{CDCl}_3$ ) :  $\delta$  7.86 ( d,  $J = 8.4$  Hz, 2H ), 7.55 (d,  $J = 8.6$  Hz, 2H ), 4.36 ( d,  $J = 5.6$  Hz, 2H ), 4.06 – 4.01 (m, 1H ), 3.78 – 3.59 (m, 2H ), 3.21 (s, 2H );  $^{13}\text{C NMR}$  (50 MHz, ,  $\text{CDCl}_3$ ): 166.2, 131.8, 131.2, 128.5, 70.2, 65.9, 63.4 .

. LRMS- calculated for  $\text{C}_{10}\text{H}_{12}\text{BrO}_4 = 274.9919$ ; found 274.9946

**2,3-Dihydroxypropyl 4-methylbenzoate (5c)<sup>10</sup> :**

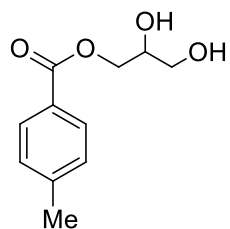

Yield (0.151g,72%) ;  $^1\text{H NMR}$  (200 MHz,  $\text{CDCl}_3$ ) :  $\delta$  7.89 ( d,  $J = 7.2$  Hz, 2H ), 7.17 (d,  $J = 7.4$  Hz, 2H ), 4.32 ( d,  $J = 5.0$  Hz, 2H), 4.02 (s, 2H ), 3.89 (d,  $J = 4,4$  Hz, 1H ), 3.71 – 3.65 (m, 2H ), 2.33 (s, 2H );  $^{13}\text{C NMR}$  (50 MHz, ,  $\text{CDCl}_3$ ): 167.0, 143.9, 129.7, 129.1, 126.9, 70.3, 65.5, 63.5, 21.6 .

**2-Hydroxyethyl benzoate (5d)<sup>11</sup>:**

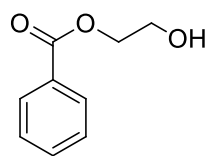

Yield 0.121g, 73%) ;  $^1\text{H NMR}$  (200 MHz,  $\text{CDCl}_3$ ) :  $\delta$  7.93 ( d,  $J = 7.6$  Hz, 2H ), 7.44 – 7.36 (m, 1H ), 7.30 – 7.23 ( m, 2H ), 4.31 – 4.27 (m, 2H ), 3.82 – 3.77 (m, 2H ), 3.55 (s, 1H );  $^{13}\text{C NMR}$  (50 MHz, ,  $\text{CDCl}_3$ ): 167.0, 133.1, 129.6, 128.3, 66.5, 60.8.

**2-Hydroxyethyl 4-bromobenzoate (5e)<sup>12</sup>:**

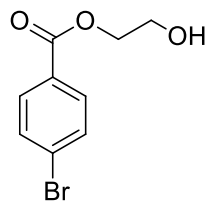

Yield (0.203g, 83%) ; <sup>1</sup>H NMR (200 MHz, CDCl<sub>3</sub>): δ 7.91 ( d, *J* = 8.4 Hz, 2H ), 7.58 (d, *J* = 8.4 Hz, 2H ), 4.46 – 4.41 ( m, 2H ), 3.96 – 3.86 (m, 2H ), 2.26 (s, 1H ); <sup>13</sup>C NMR (50 MHz, , CDCl<sub>3</sub>): 166.3, 131.7, 131.2, 128.7, 128.3, 66.8, 61.2 .

**2-Hydroxyethyl 4-methylbenzoate (5f)<sup>13</sup>:**

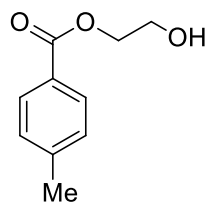

Yield (0.128g, 71%) ; <sup>1</sup>H NMR (200 MHz, CDCl<sub>3</sub>): δ 7.89 ( d, *J* = 8.0 Hz, 2H ), 7.15 (d, *J* = 8.0 Hz, 2H ), 4.36 – 4.32 ( m, 2H ), 3.87 – 3.83 (m, 2H ), 3.46 (s, 1H ), 2.31 (s, 3H); <sup>13</sup>C NMR (50 MHz, , CDCl<sub>3</sub>): 168.8, 143.6, 129.5, 128.8, 126.9, 66.1, 60.7, 21.3 .

**References :**

1. A .B. Powell and S. S. Stahl, *Org. Lett.*, 2013, **15** , 5072–5075.
2. I. N. C. Kiran, K. Lalwani and A. Sudalai, *RSC Adv.*, 2013, **3**, 1695-1698.
3. Y. Zhu and Y. Wei, *Eur. J. Org. Chem.* 2013, 4503–4508.

4. J. Pan, X. Wang, Y. Zhang and S. L. Buchwald, *Org. Lett.* 2011, **13**, 4974–4976.
5. R. Shang, Y. Fu, J.-B. Li, S.-L. Zhang, Q.-X. Guo and L. Liu, *J. Am. Chem. Soc.*, 2009, **131**, 5738–5739.
6. T. Iwasaki, Y. Maegawa, Y. Hayashi, T. Ohshima, K. Mashima, *J. Org. Chem.*, 2008, **73**, 5147–5150.
7. A. K. Chakraborti, B. Singh, S. V. Chankeshwara and A. R. Patel, *J. Org. Chem.*, 2009, **74**, 5967–5974.
8. C. Liu, S. Tang, L. Zheng, D. Liu, H. Zhang and A. Lei, *Angew. Chem. Int. Ed.* 2012, **51**, 5662–5666.
9. J. R. Hwu, Moti L. Jain, F. Y. Tsai, S. C. Tsay, A. Balakumar and G. H. Hakimelahi, *J. Org. Chem.*, 2000, **65**, 5077–5088.
10. I. Batovska, D. S. Tsubota, Y. Kato, Y. Asano and M. Ubukata, *Tetrahedron: Asymmetry* 2004 **15**, 3551–3559.
11. N. Chidambaram, S. Bhat and S. J. Chandrasekaran, *Org. Chem.* 1992, **57**, 5013–5015.
12. R. Gopinath, B. Barkakaty, B. Talukdar and B. K. Patel, *J. Org. Chem.* 2003, **68**, 2944–2947.
13. B. M. Choudary and P. N. Reddy, *Synlett* 1995, 959–960.

# **NMR spectra for all products**

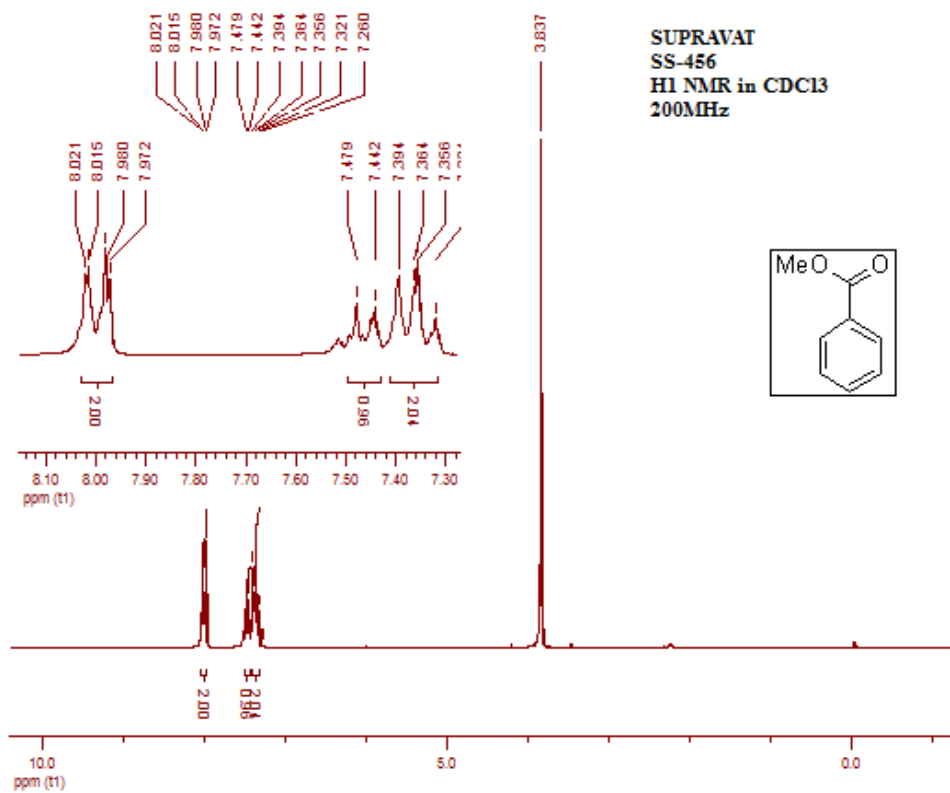

<sup>1</sup>H NMR of 3a

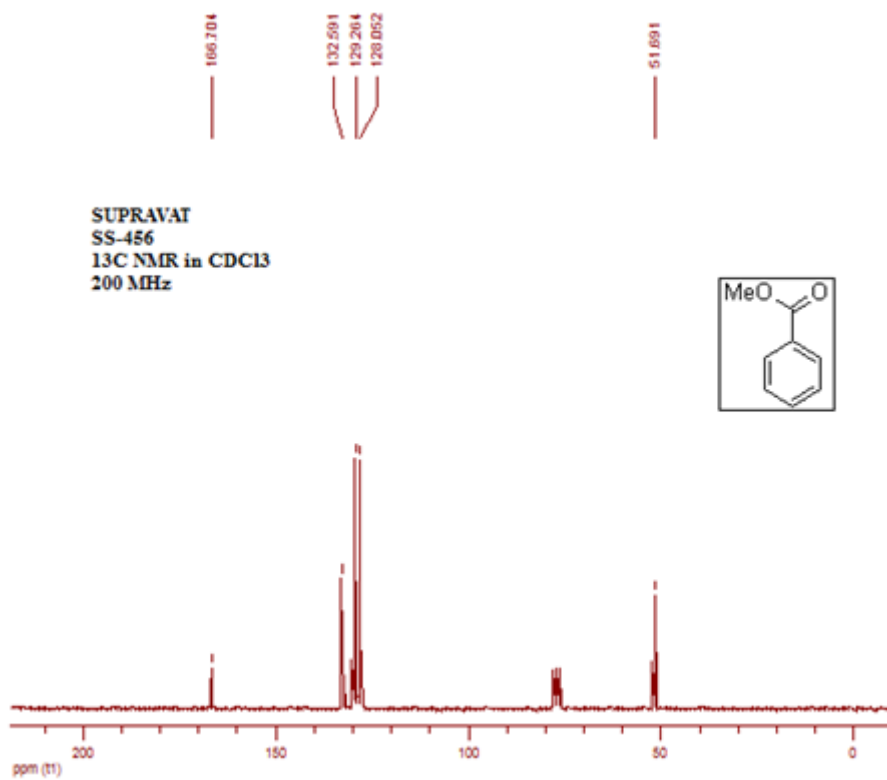

<sup>13</sup>C NMR of 3a

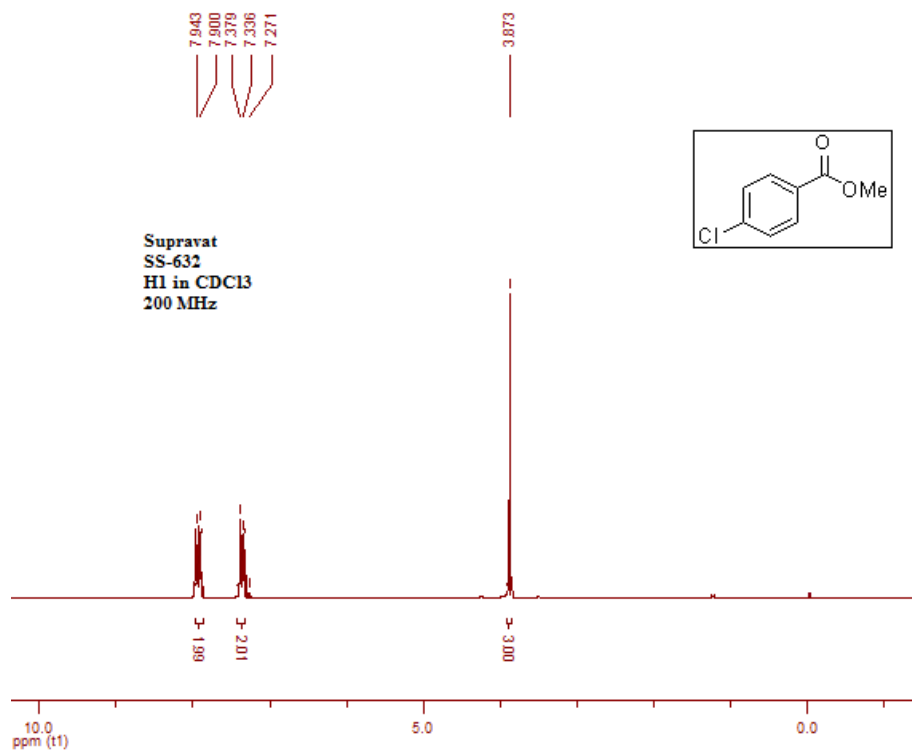

<sup>1</sup>H NMR of 3b

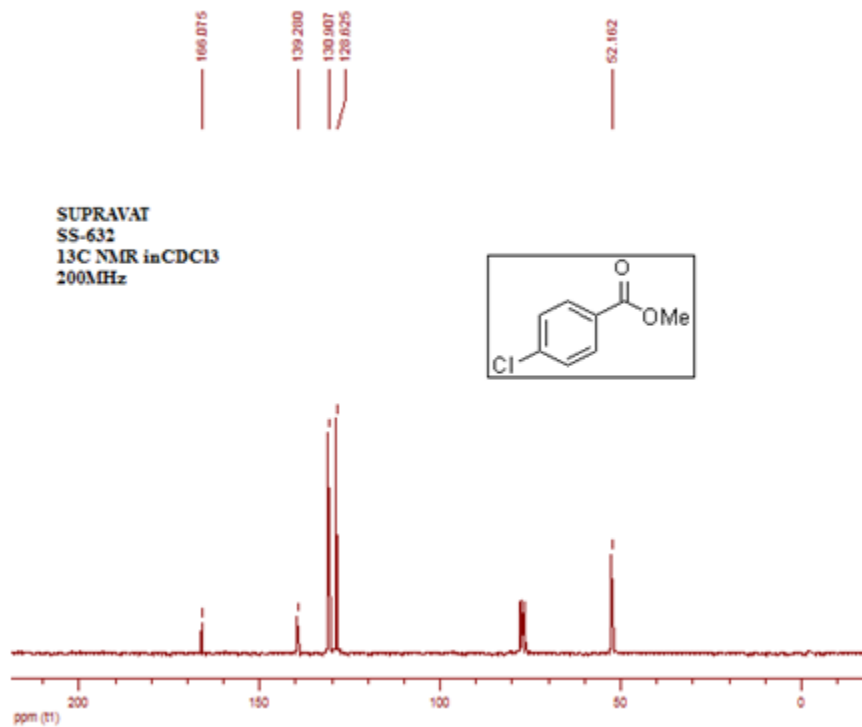

<sup>13</sup>C NMR of 3b

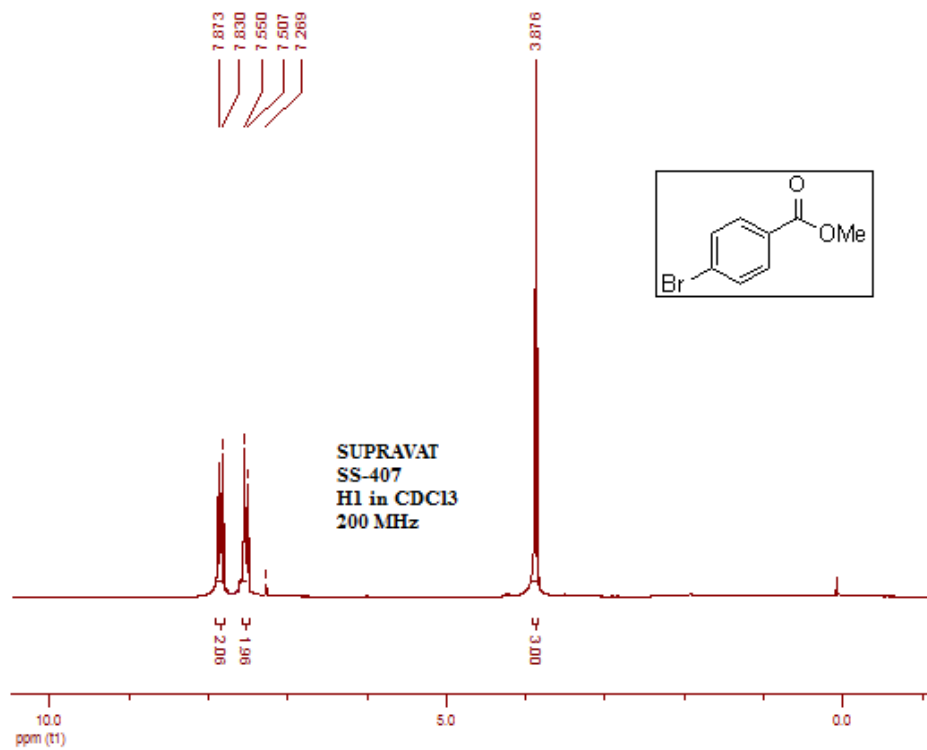

<sup>1</sup>H NMR of **3c**

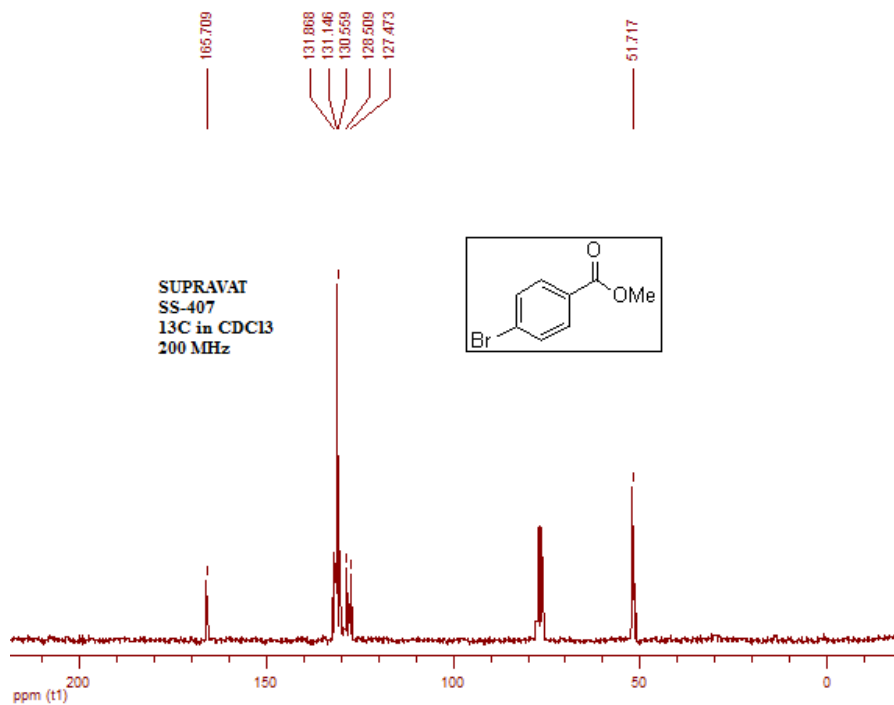

<sup>13</sup>C NMR of **3c**



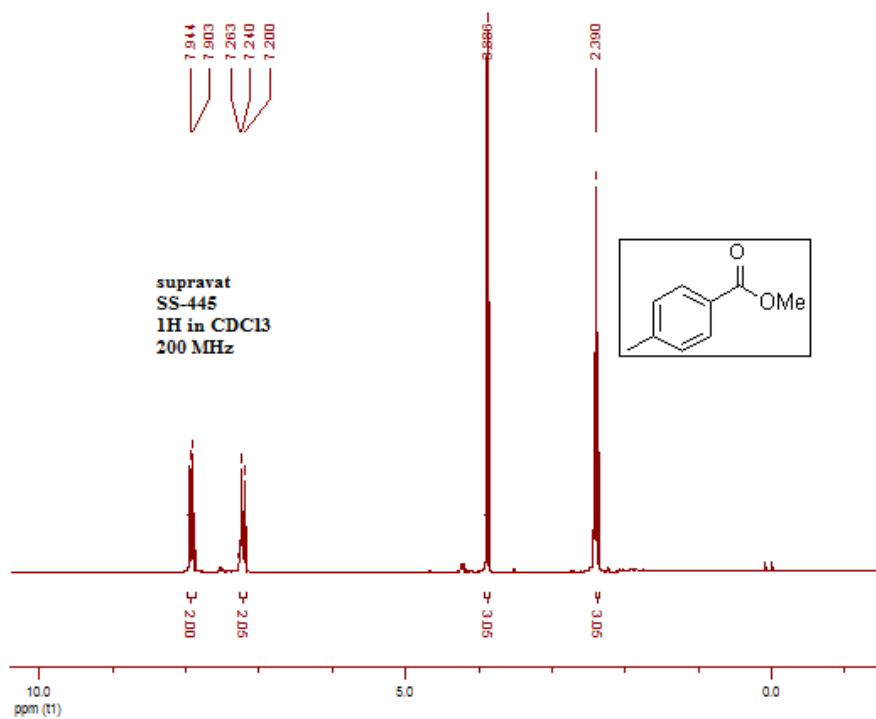

$^1\text{H}$  NMR of **3d**

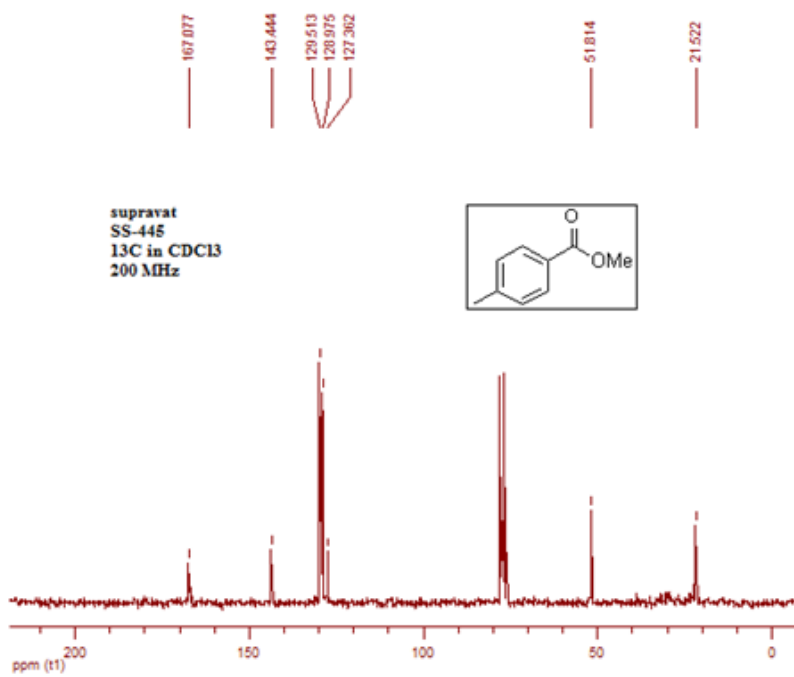

$^{13}\text{C}$  NMR of **3d**

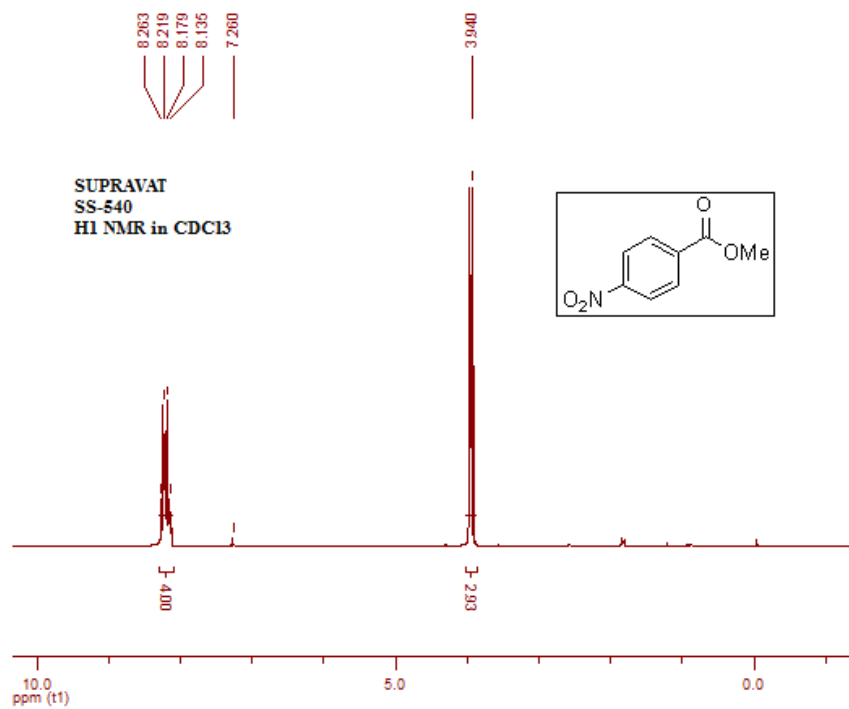

<sup>1</sup>H NMR of **3e**

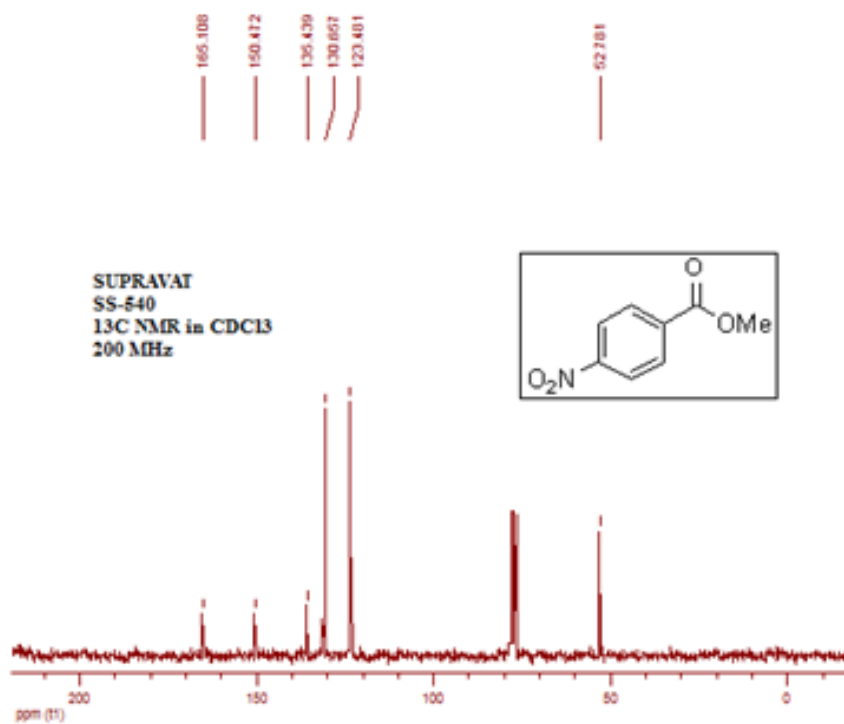

<sup>13</sup>C NMR of **3e**

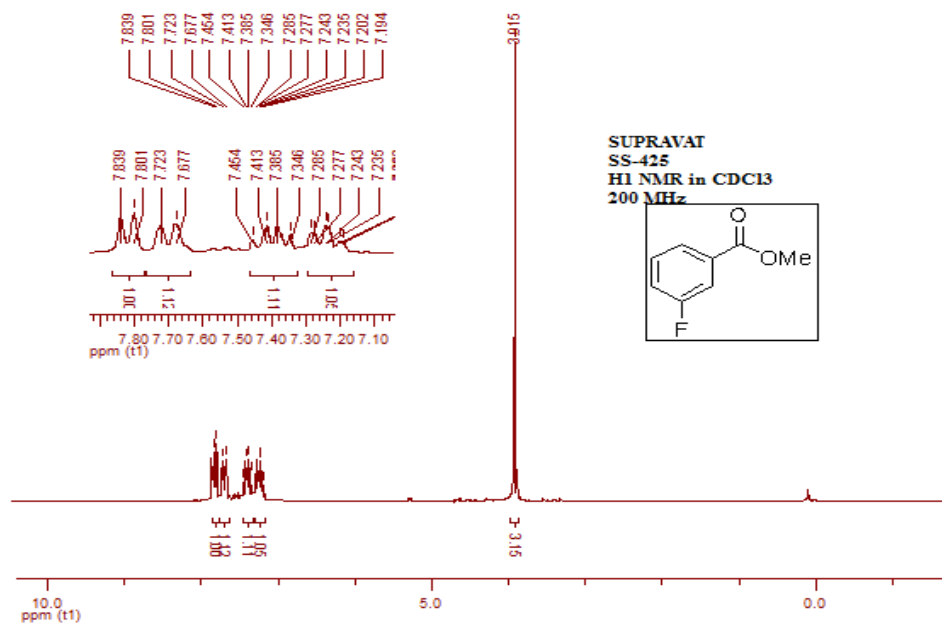

<sup>1</sup>H NMR of 3f

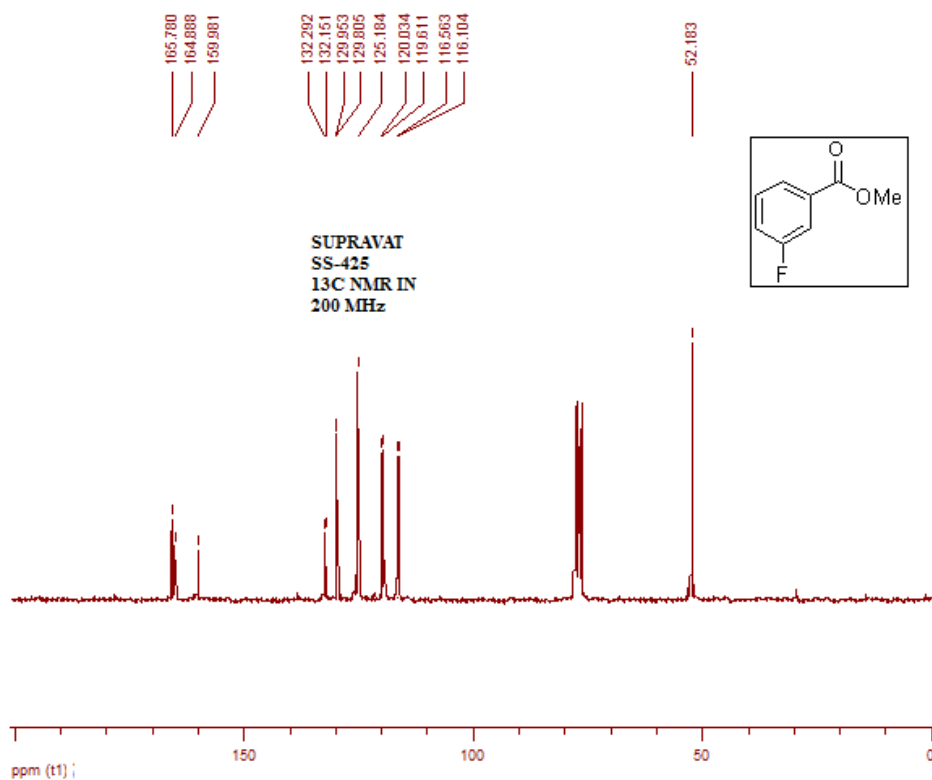

<sup>13</sup>C NMR of 3f

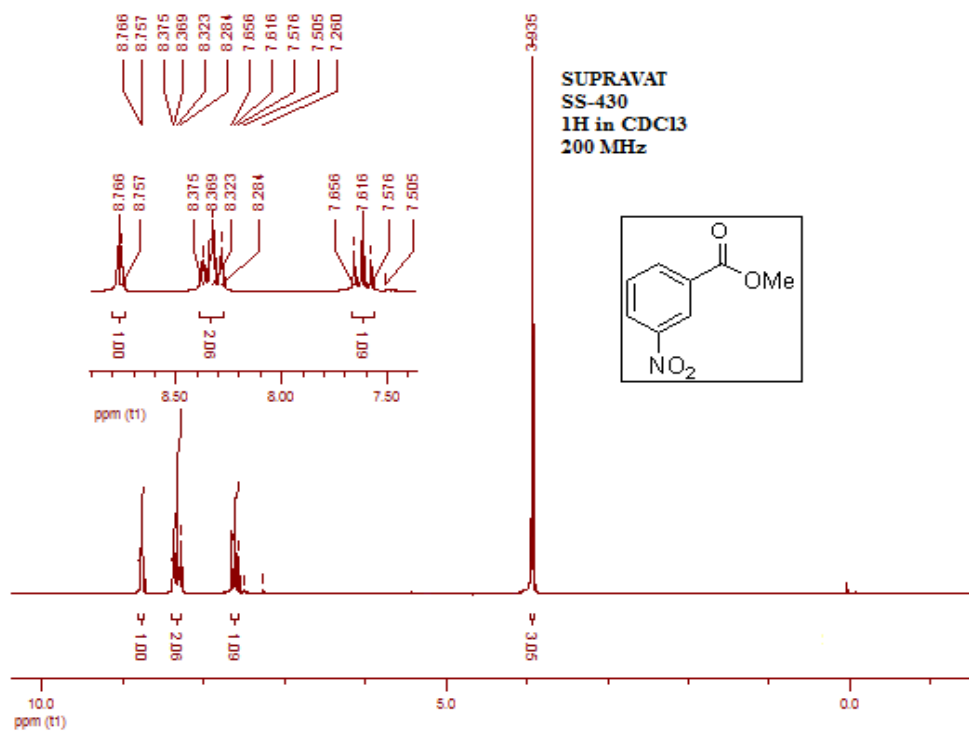

<sup>1</sup>H NMR of 3g

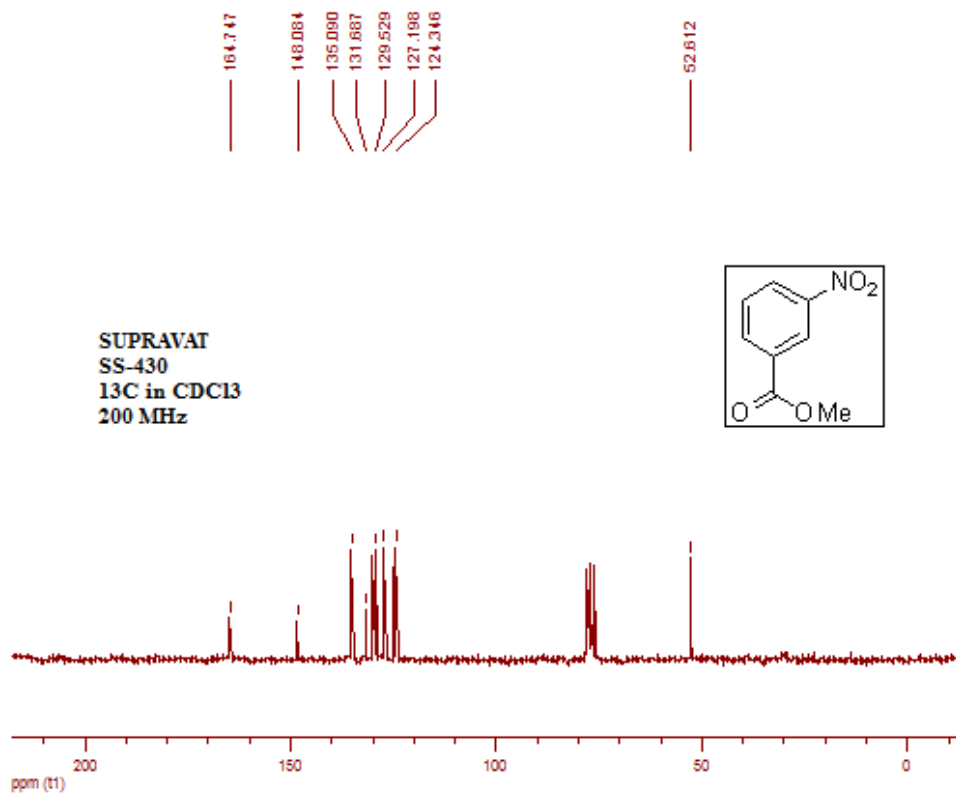

<sup>13</sup>C NMR of 3g

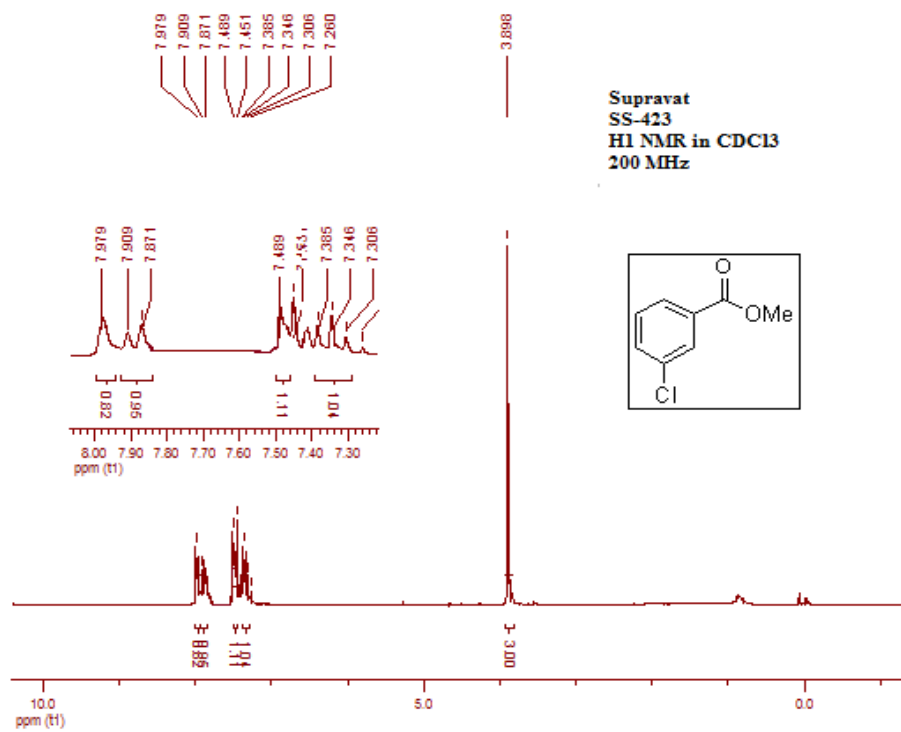

<sup>1</sup>H NMR of 3h

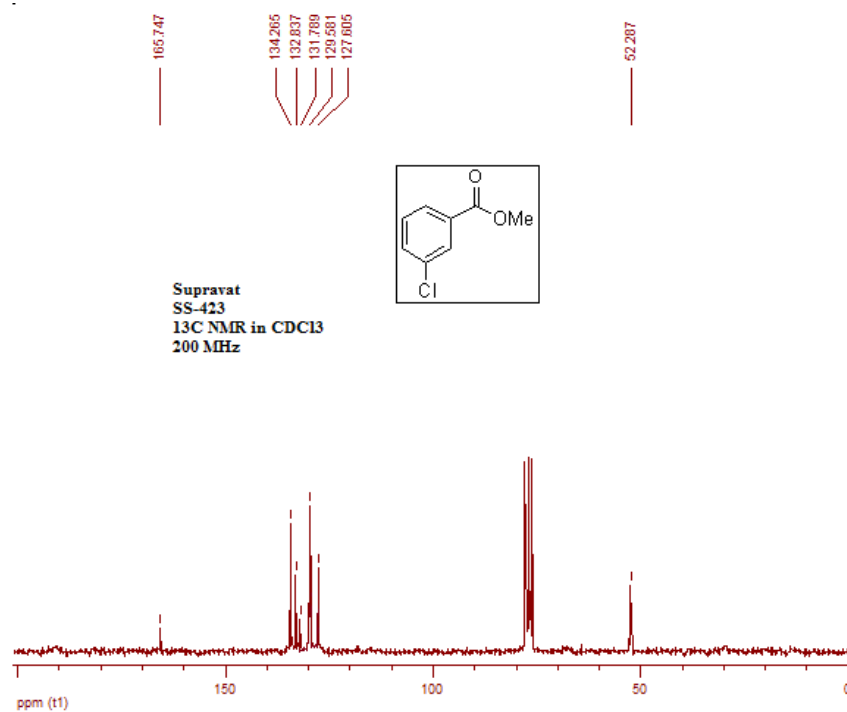

<sup>13</sup>C NMR of 3h

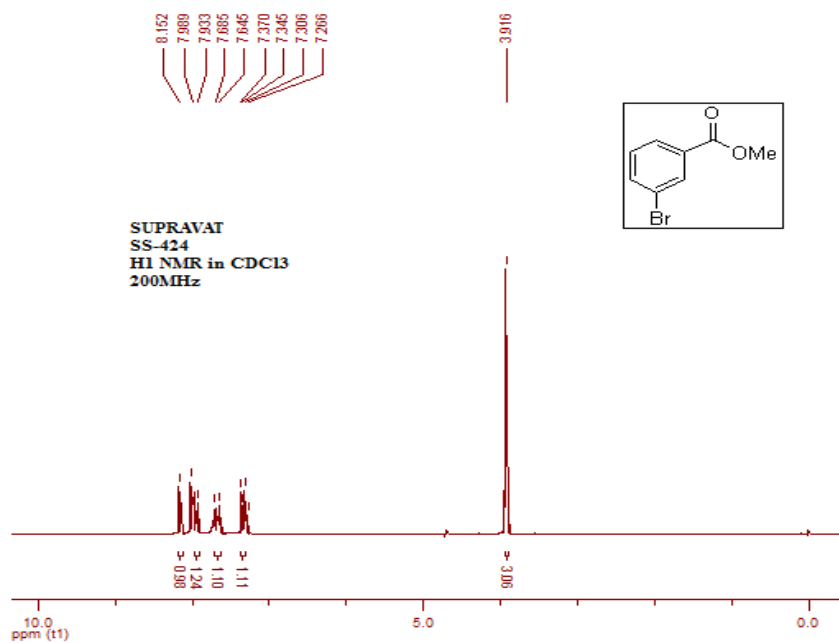

$^1\text{H}$  NMR of **3i**

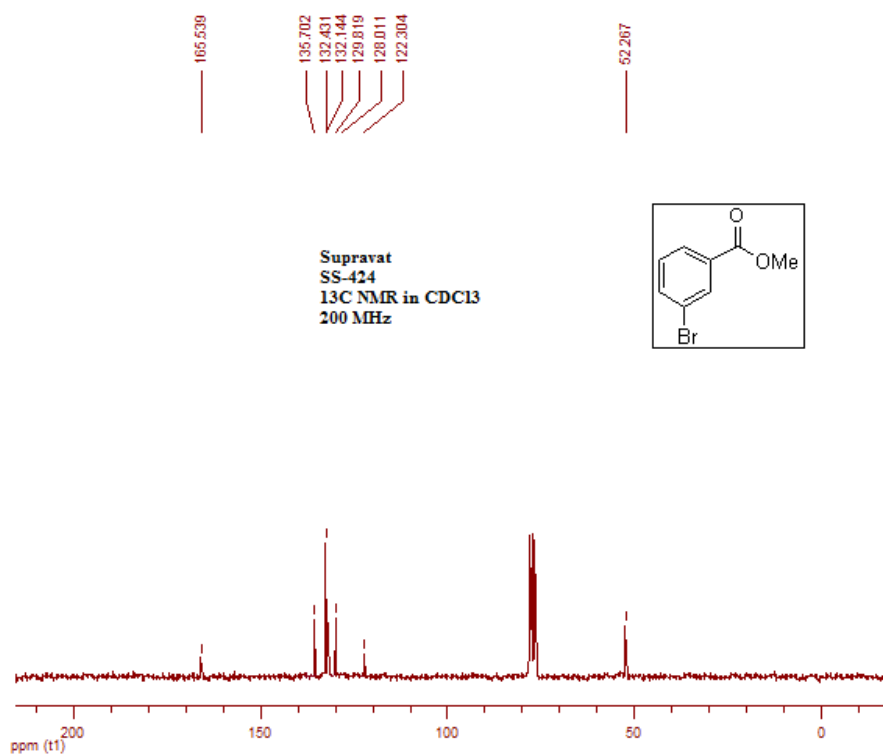

$^{13}\text{C}$  NMR of **3i**

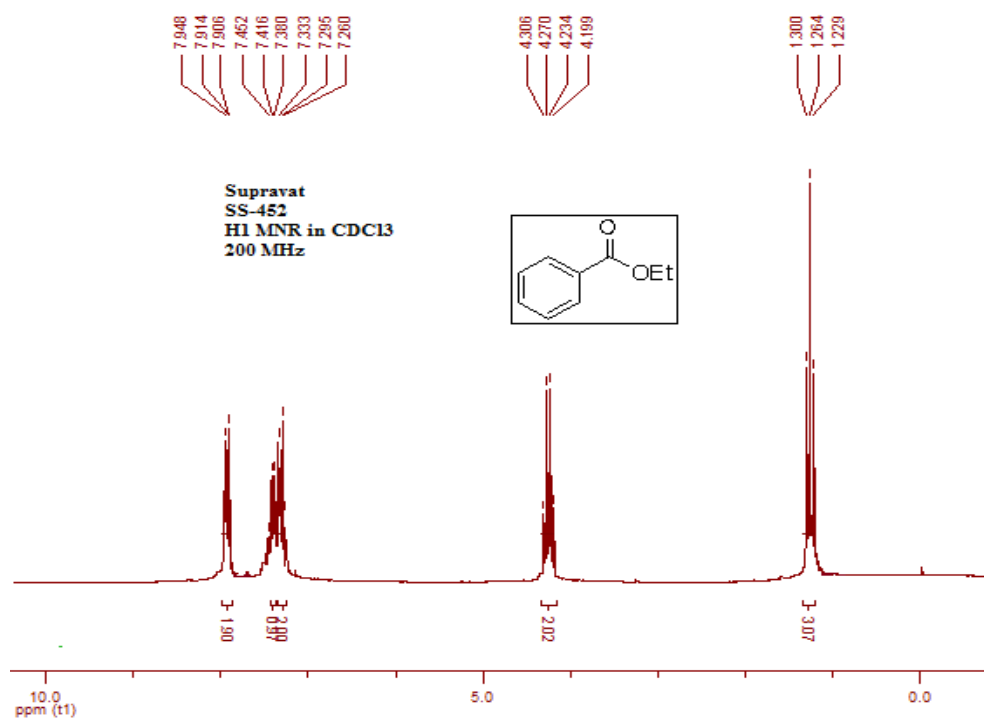

<sup>1</sup>H NMR of 3j

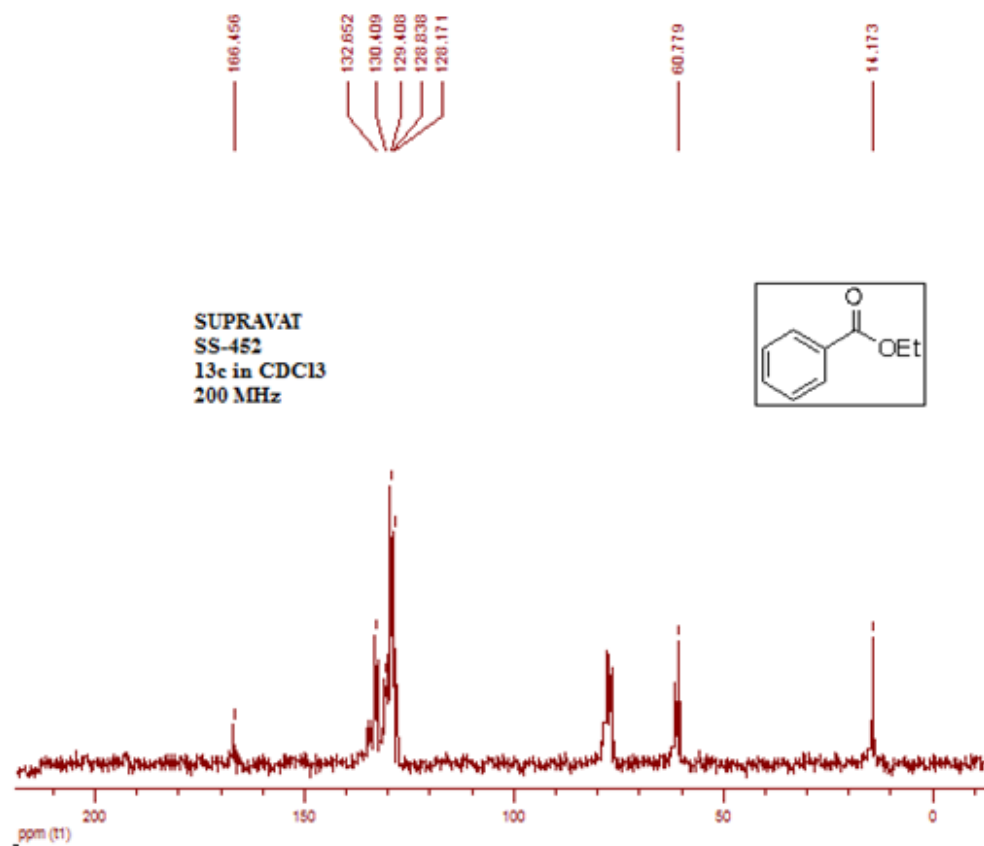

<sup>13</sup>C NMR of 3j

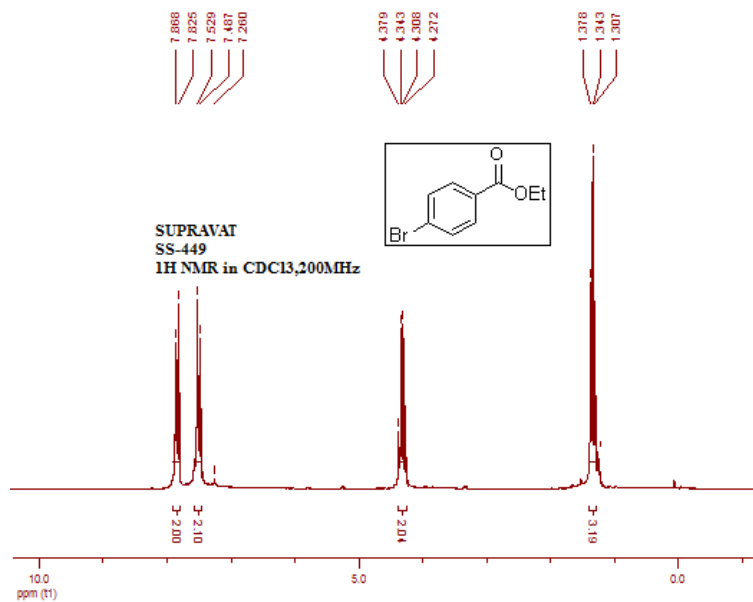

<sup>1</sup>H NMR of **3k**

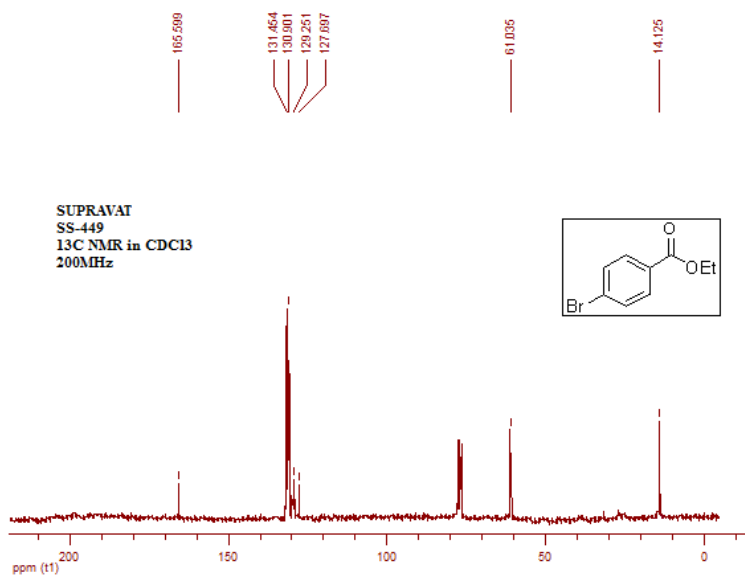

<sup>13</sup>C NMR of **3k**



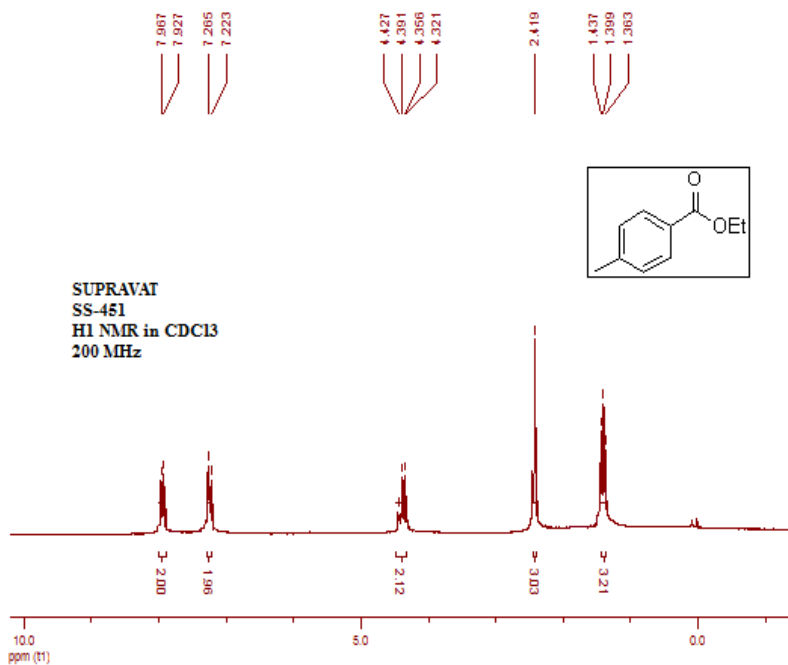

<sup>1</sup>H NMR of 3I

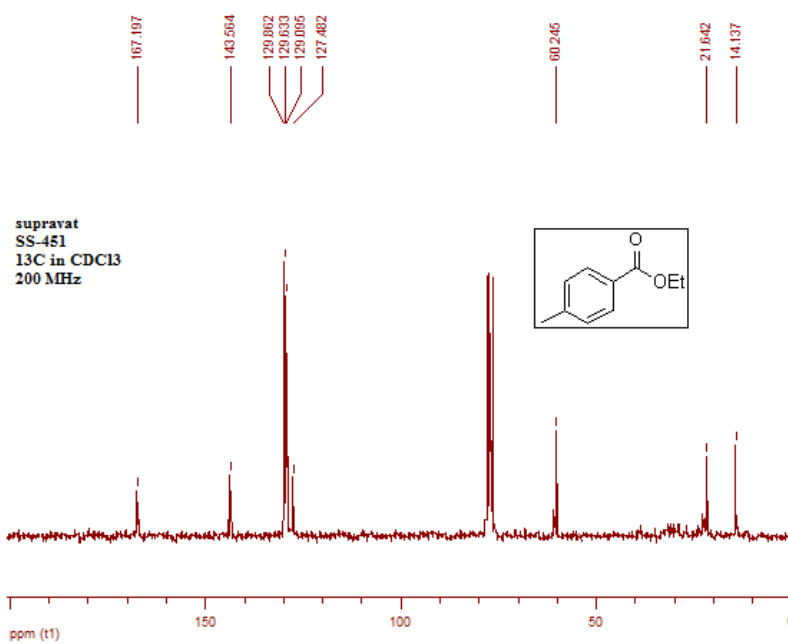

<sup>13</sup>C NMR of 3I

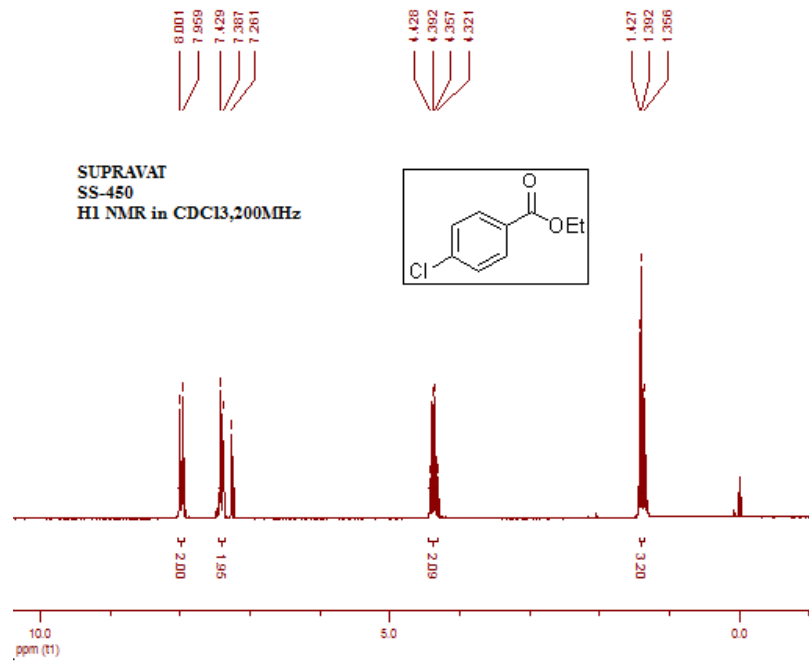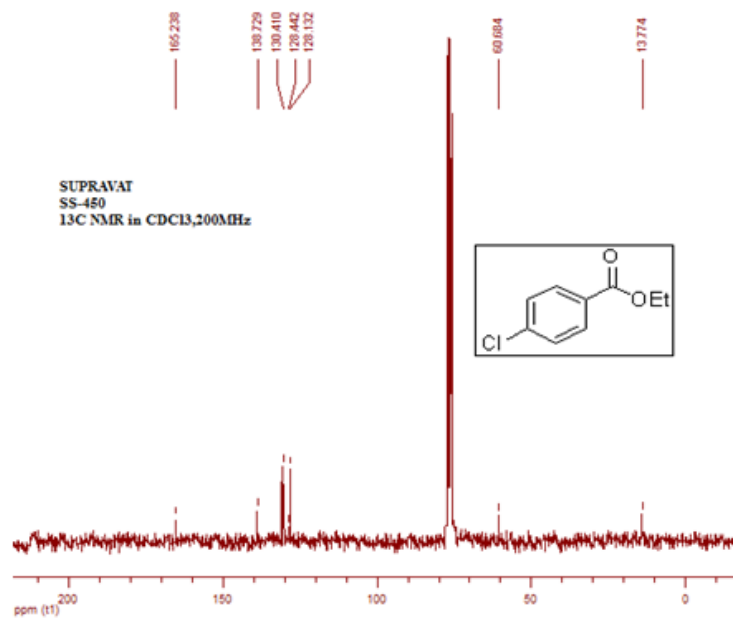

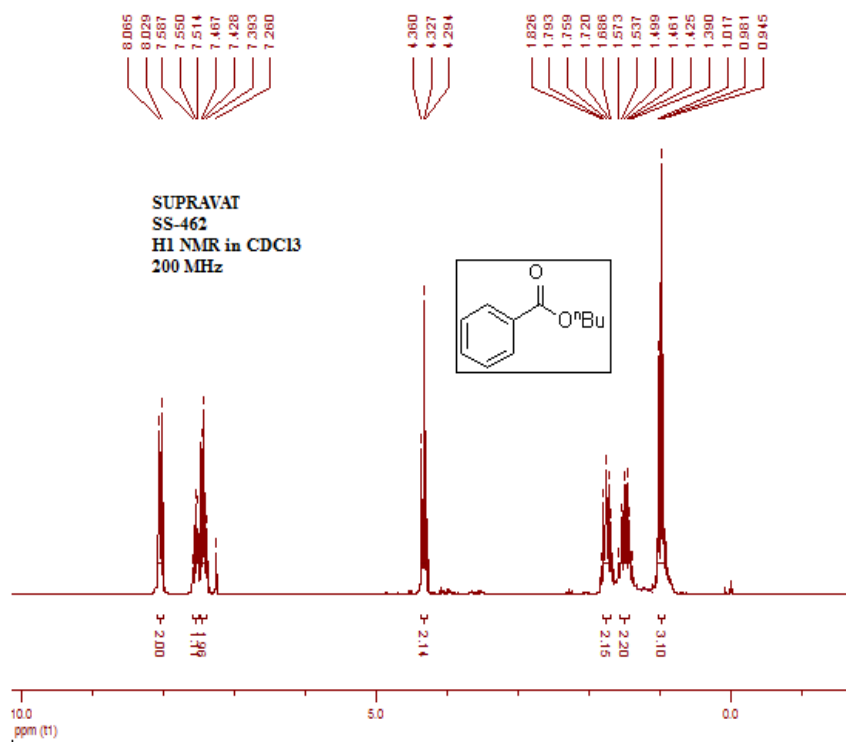

<sup>1</sup>H NMR of **3n**

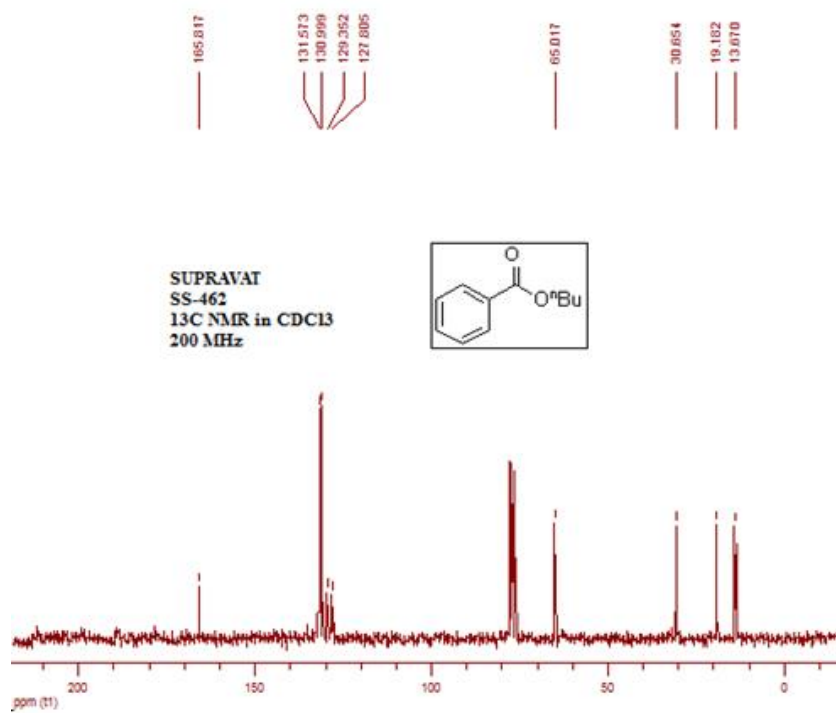

<sup>13</sup>C NMR of **3n**

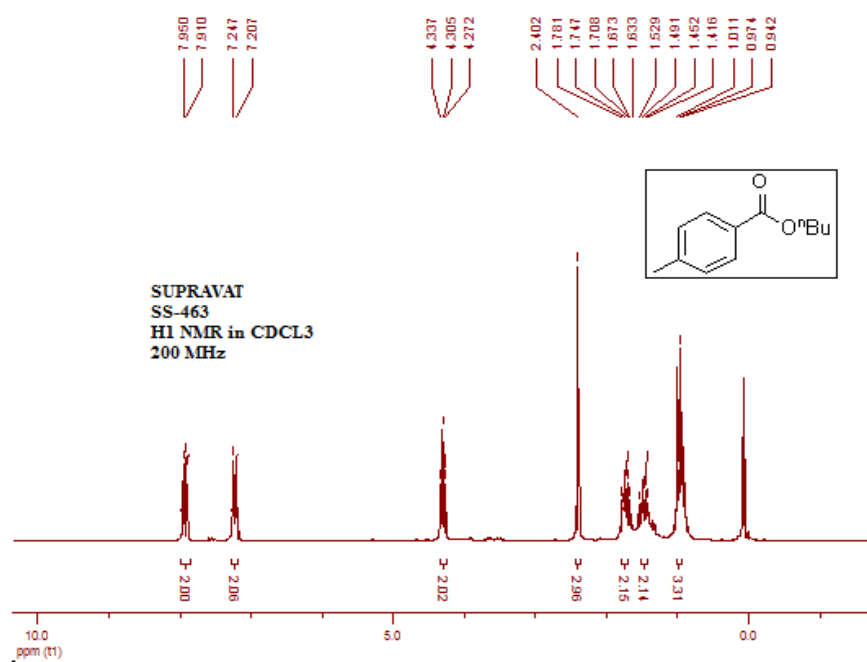

<sup>1</sup>H NMR of 3o

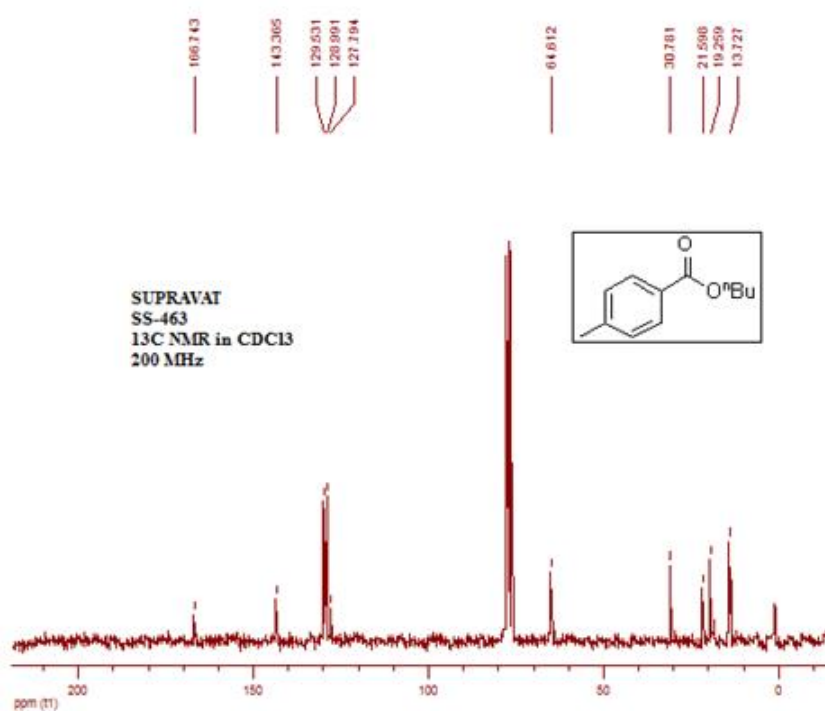

<sup>13</sup>C NMR of 3o

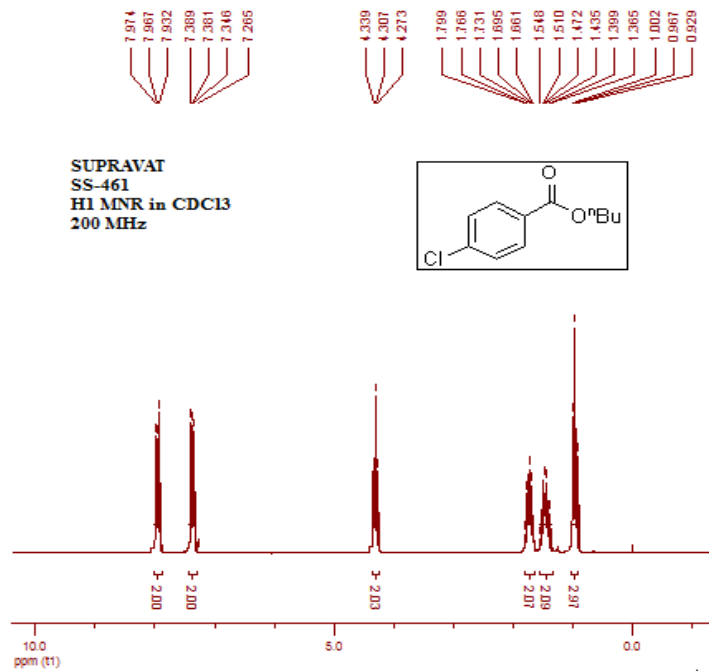

<sup>1</sup>H NMR of 3p

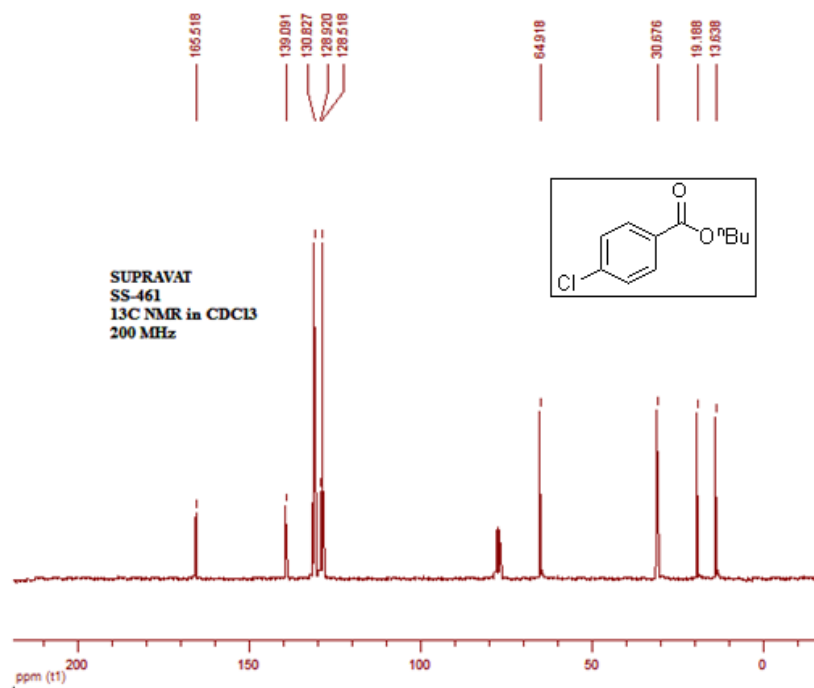

<sup>13</sup>C NMR of 3p

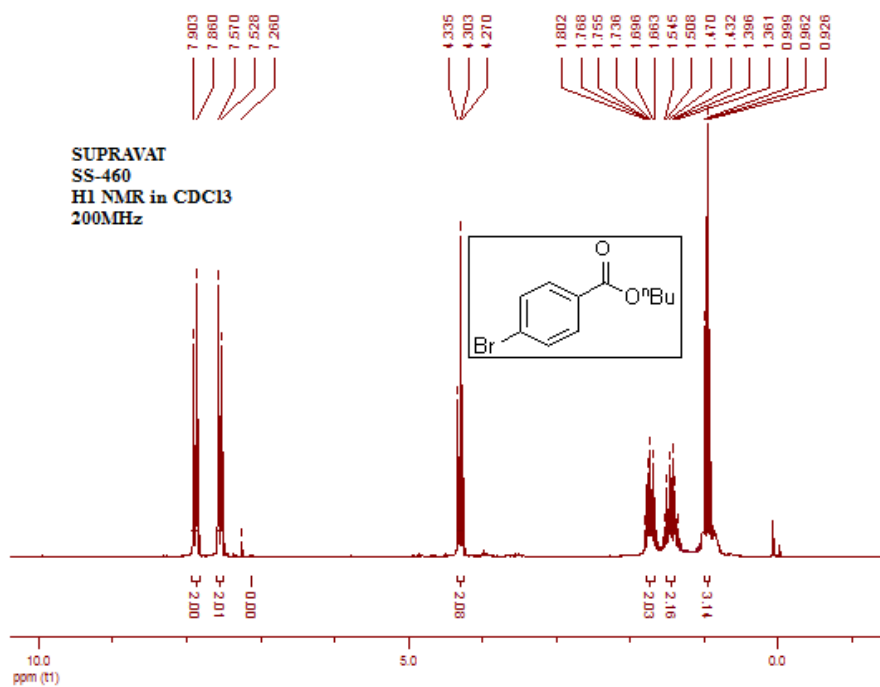

<sup>1</sup>H NMR of 3q

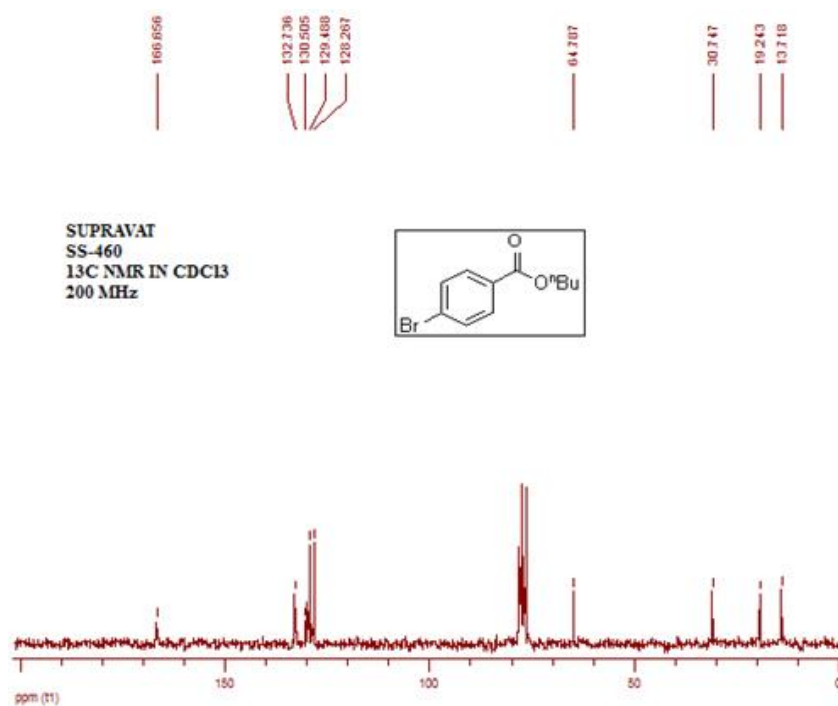

<sup>13</sup>C NMR of 3q

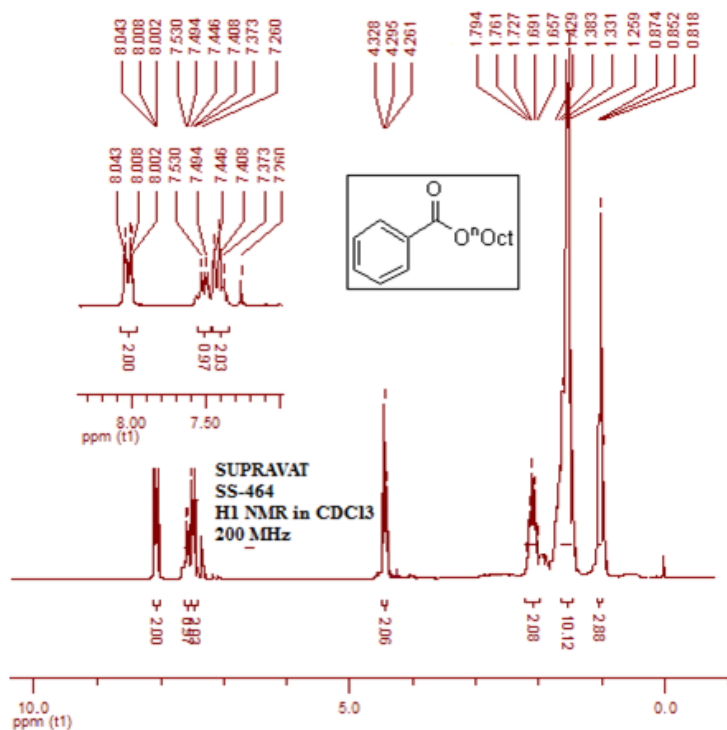

$^1\text{H}$  NMR of 3r

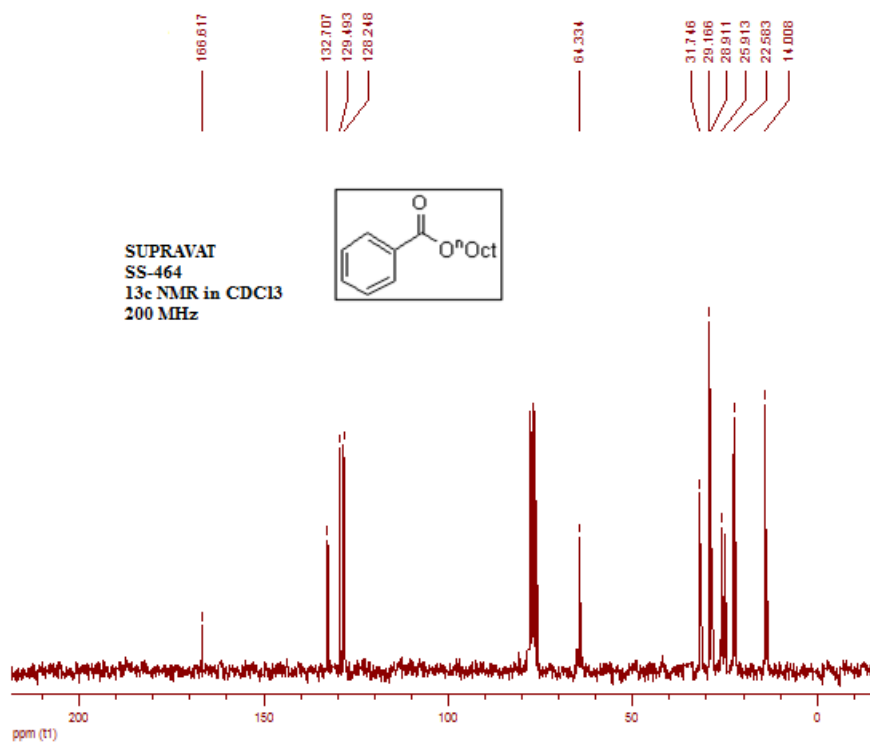

$^{13}\text{C}$  NMR of 3r

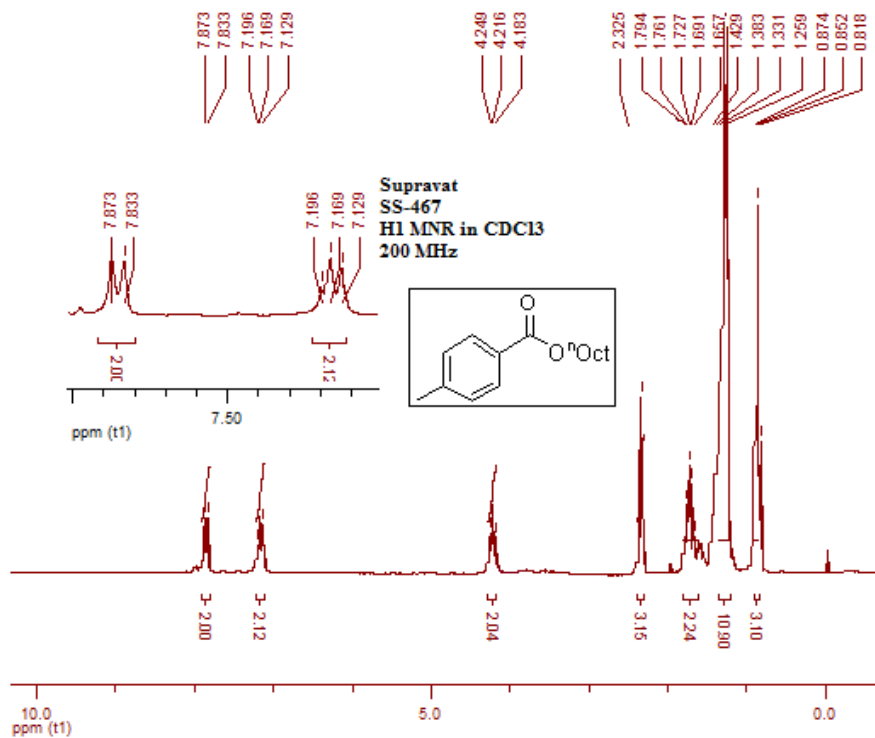

<sup>1</sup>H NMR of 3s

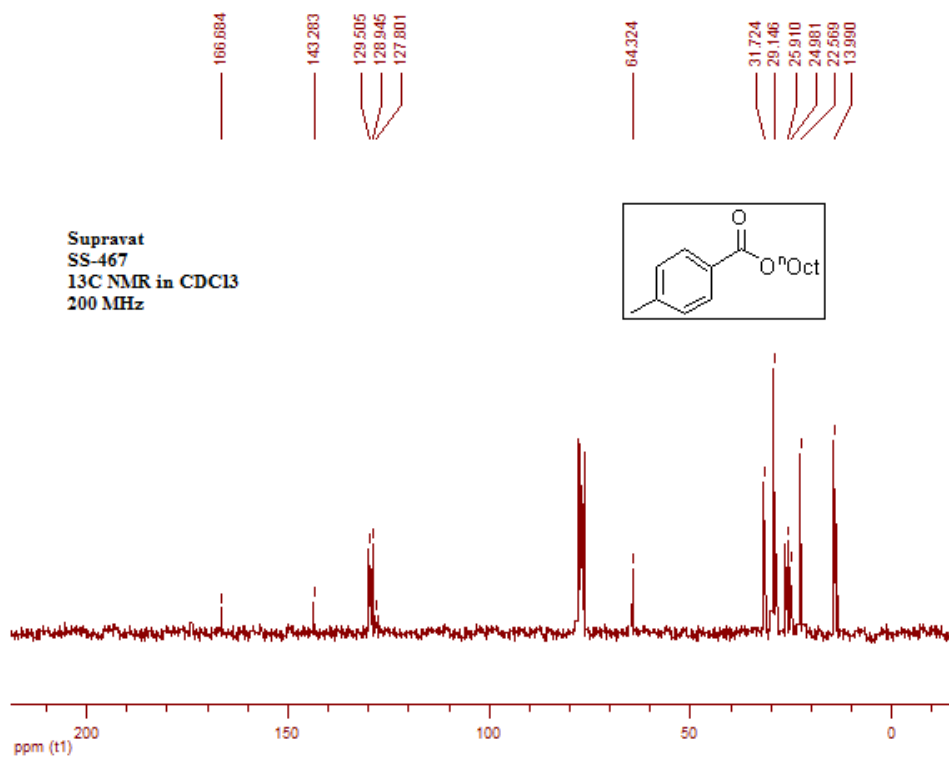

<sup>13</sup>C NMR of 3s



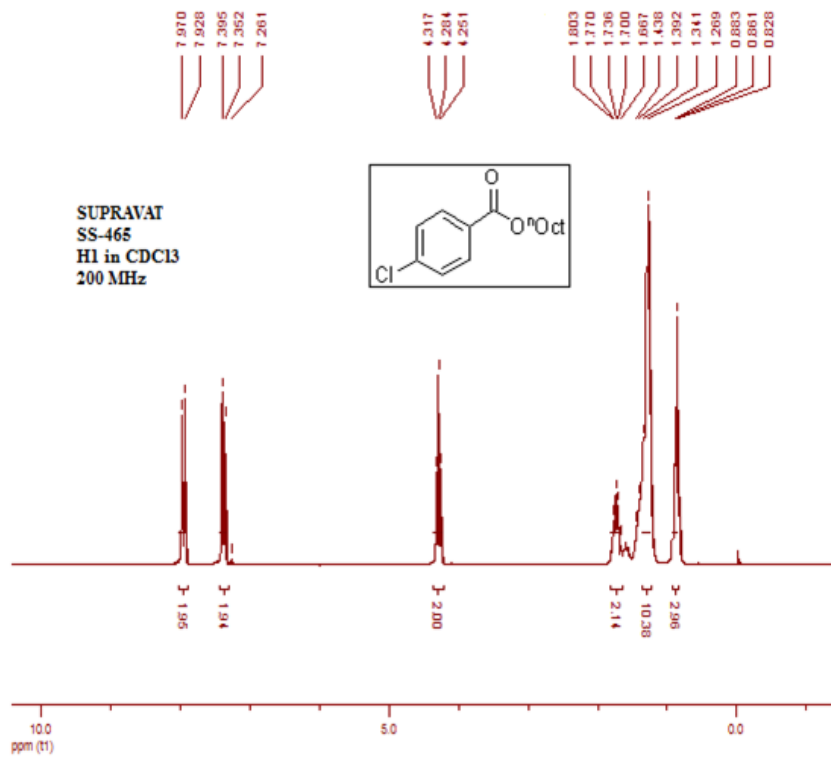

<sup>1</sup>H NMR of 3t

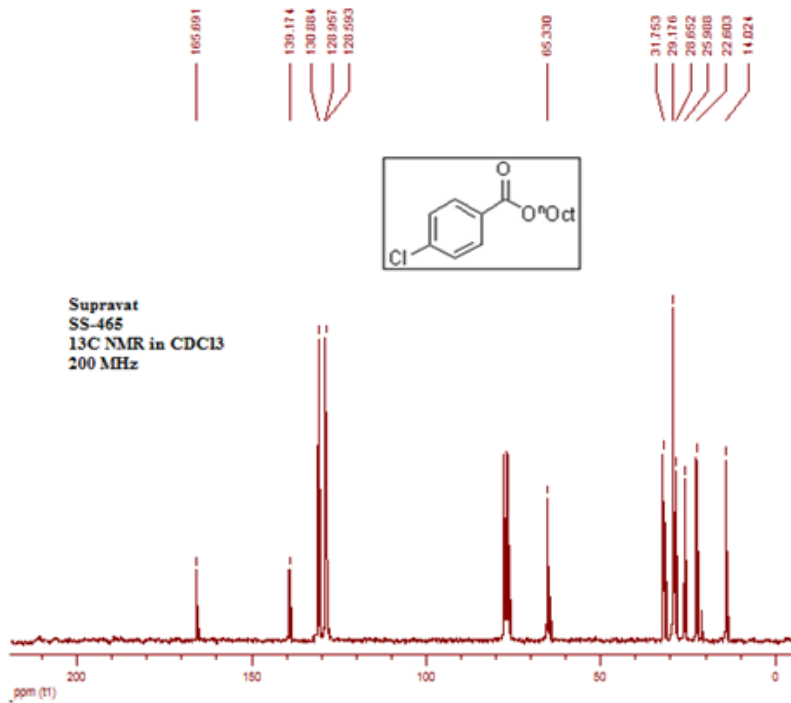

<sup>13</sup>C NMR of 3t

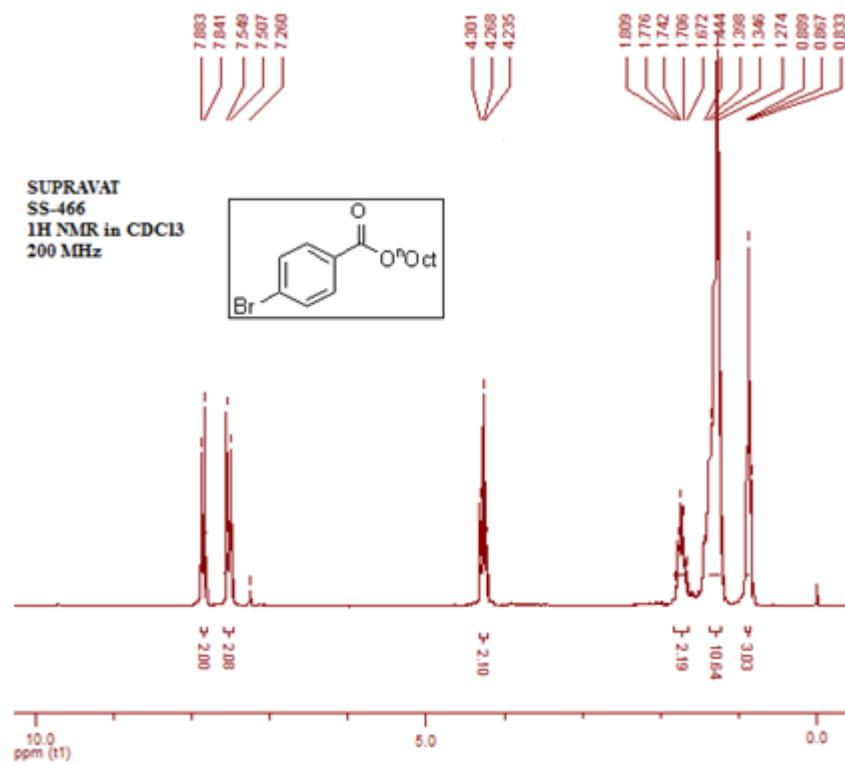

<sup>1</sup>H NMR of 3u

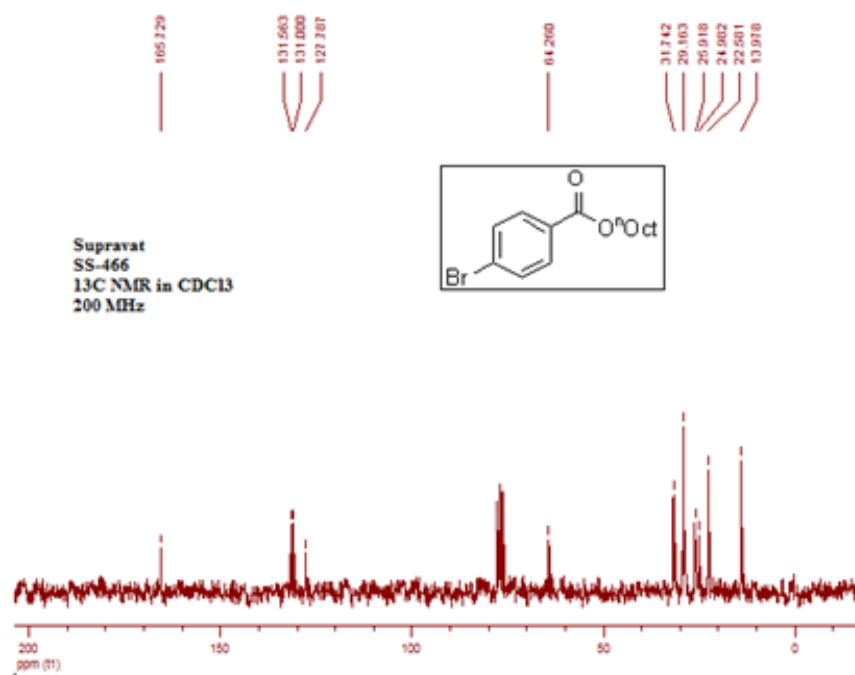

<sup>13</sup>C NMR of 3u

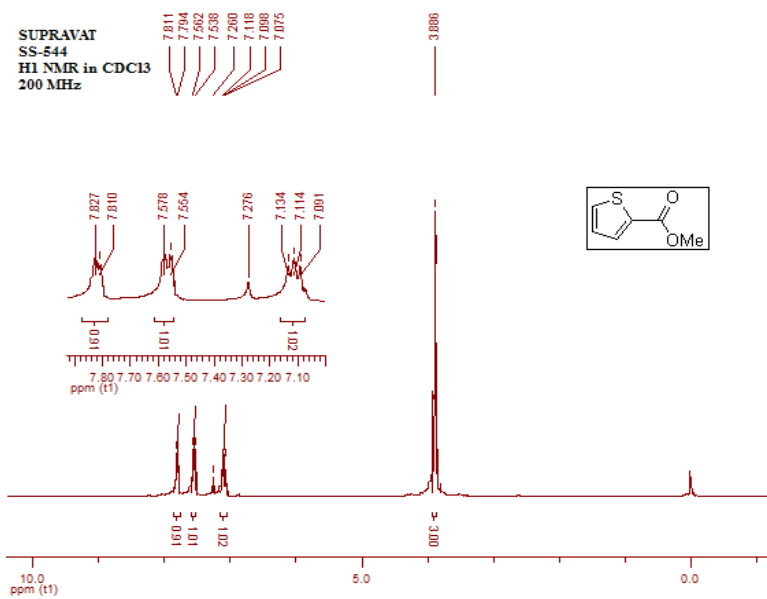

<sup>1</sup>H NMR of 3v

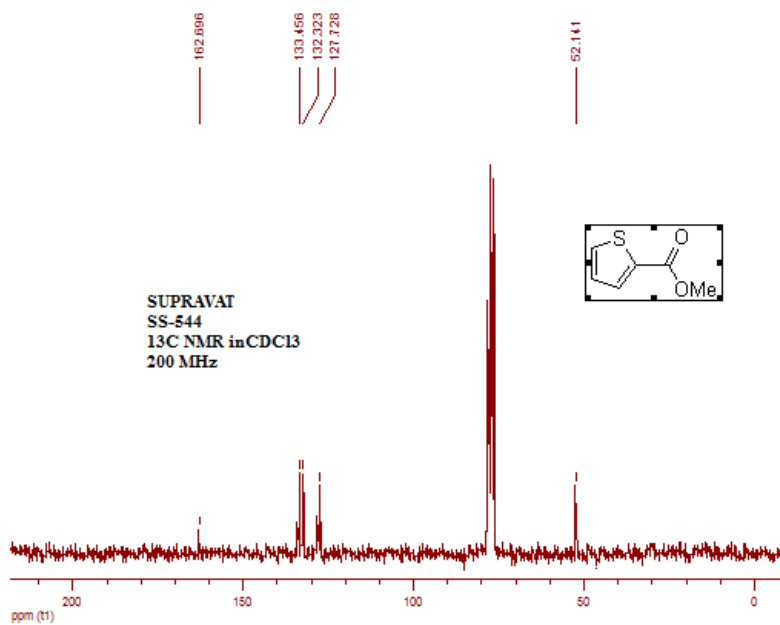

<sup>13</sup>C NMR of 3v

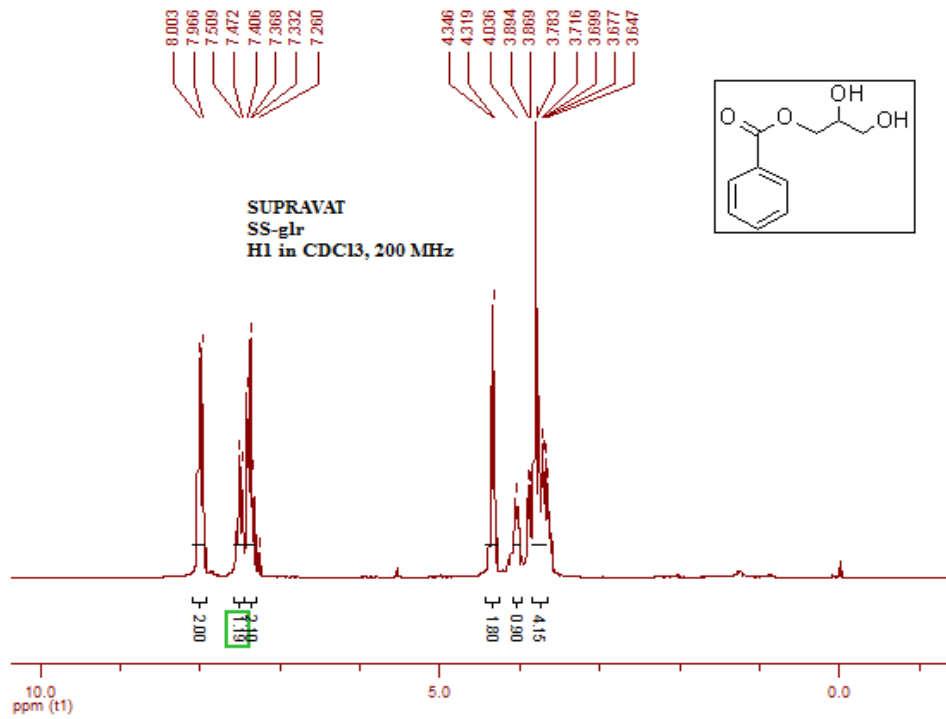

<sup>1</sup>H NMR of 5a

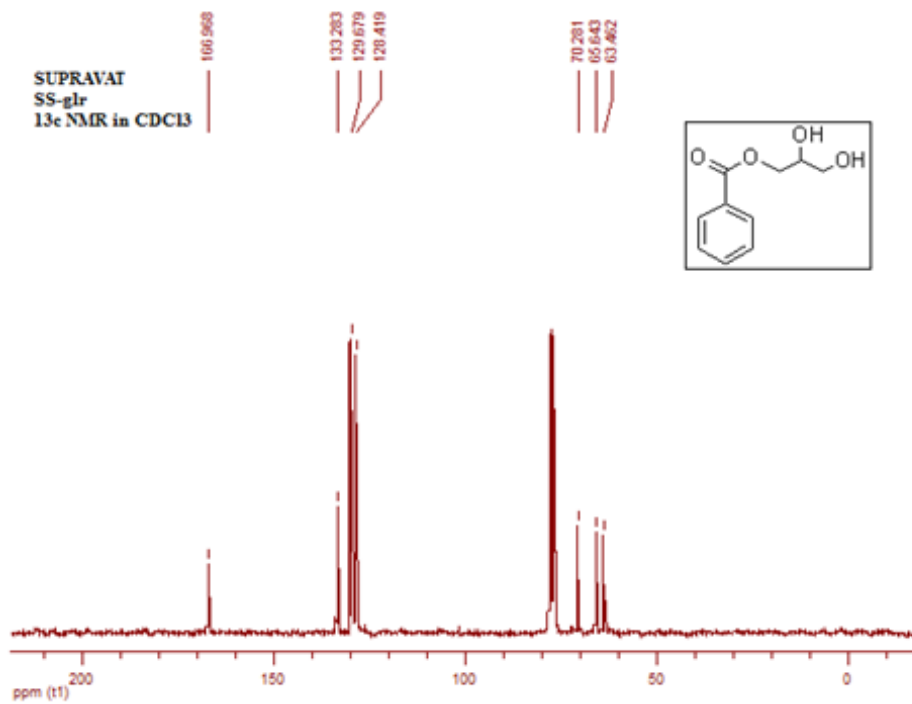

<sup>13</sup>C NMR of 5a

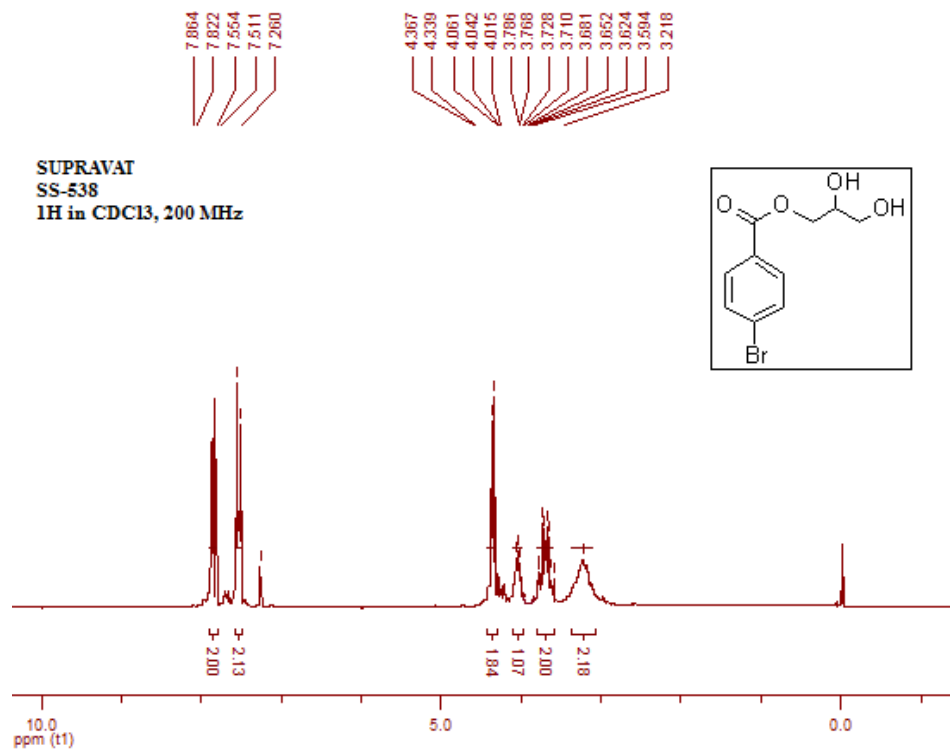

<sup>1</sup>H NMR of **5b**

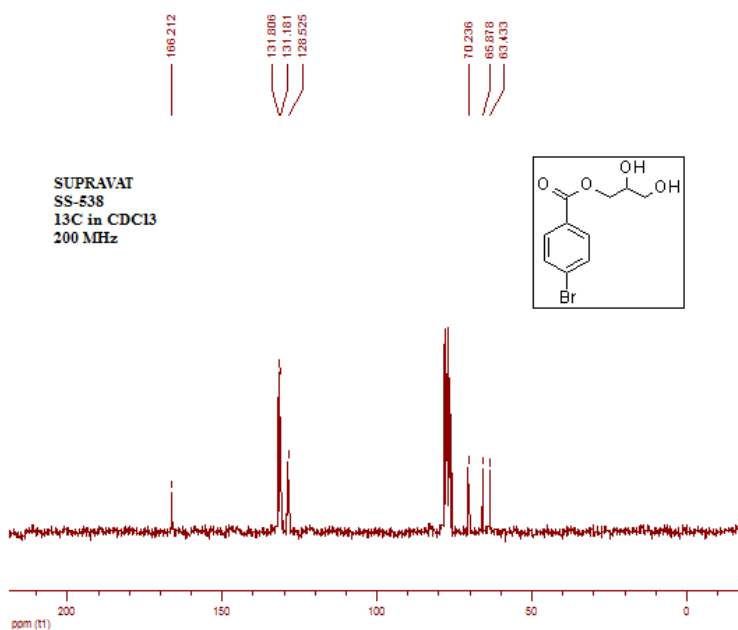

<sup>13</sup>C NMR of **5b**

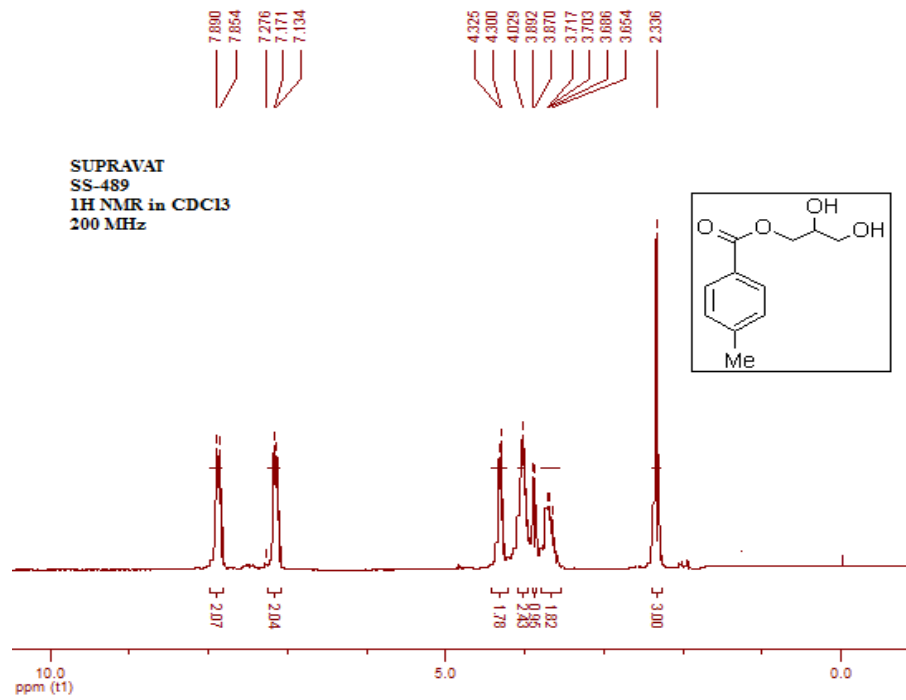

<sup>1</sup>H NMR of **5c**

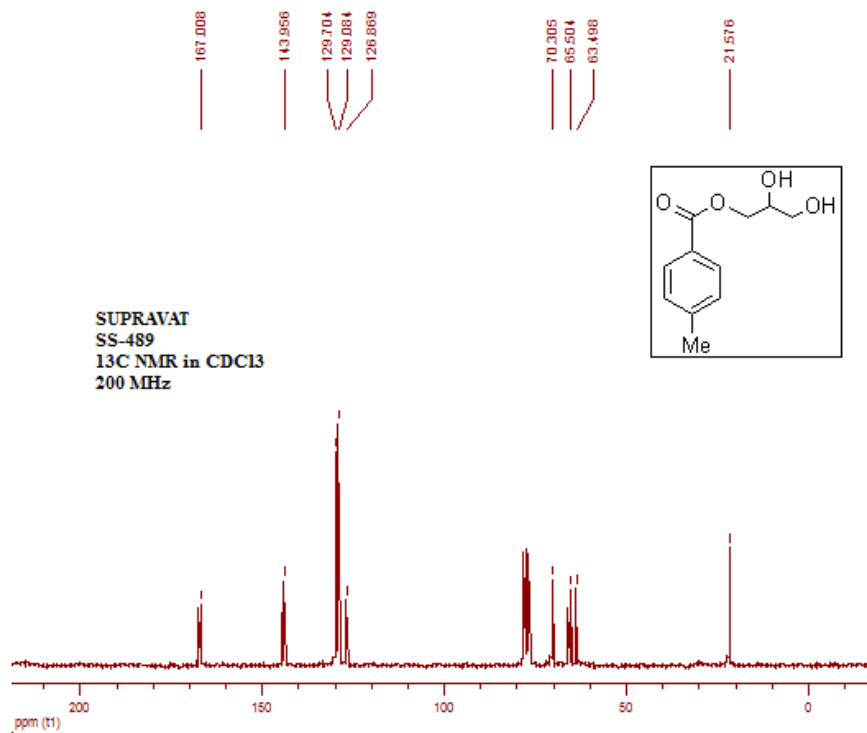

<sup>13</sup>C NMR of **5c**

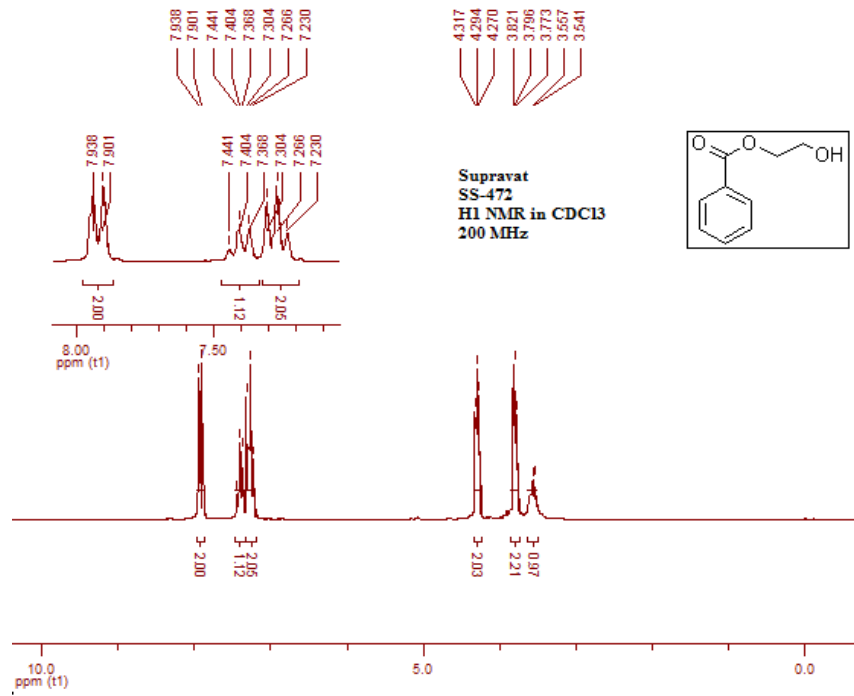

<sup>1</sup>H NMR of 5d

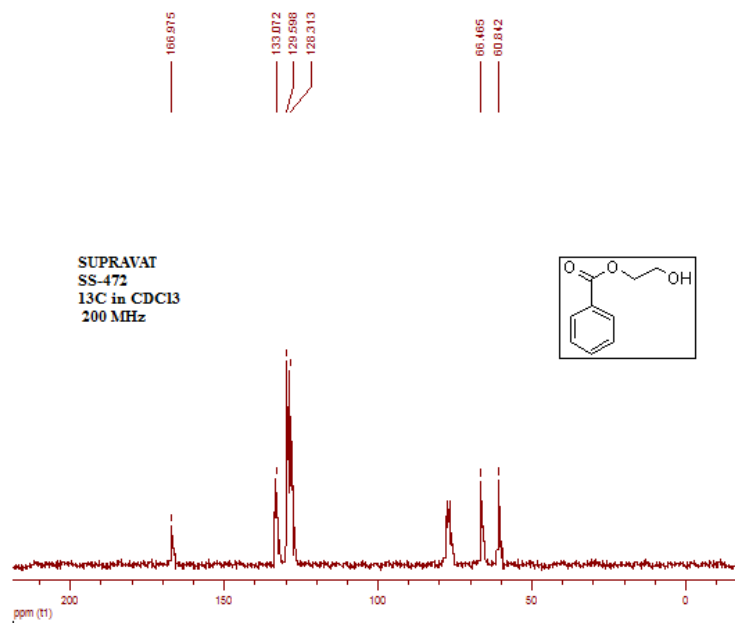

<sup>13</sup>C NMR of 5d

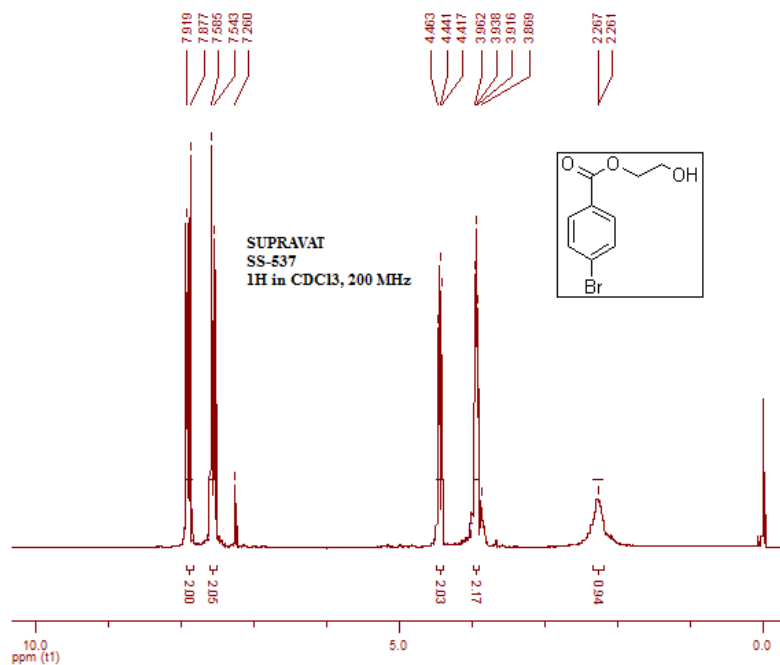

<sup>1</sup>H NMR of **5e**

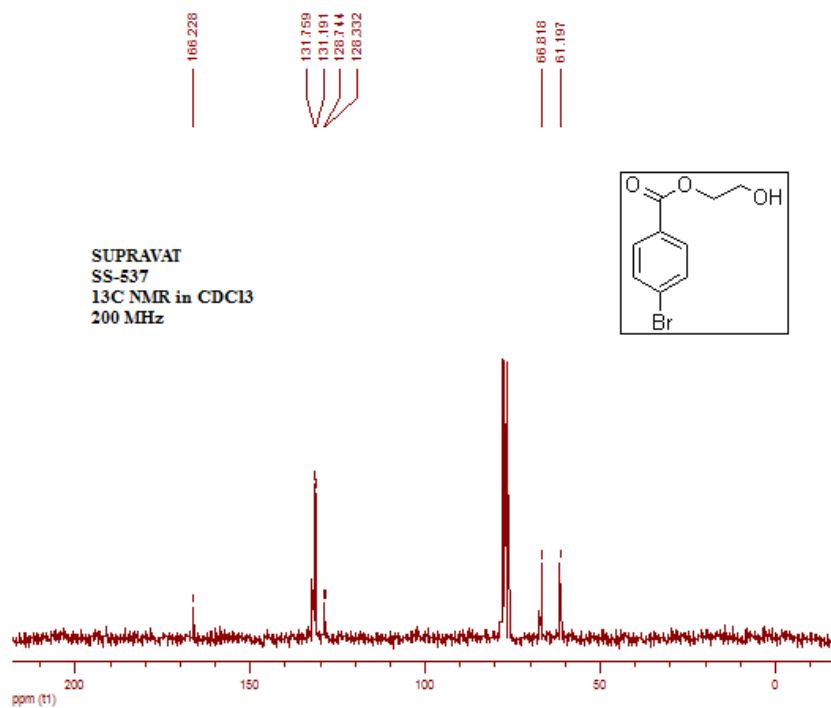

<sup>13</sup>C NMR of **5e**



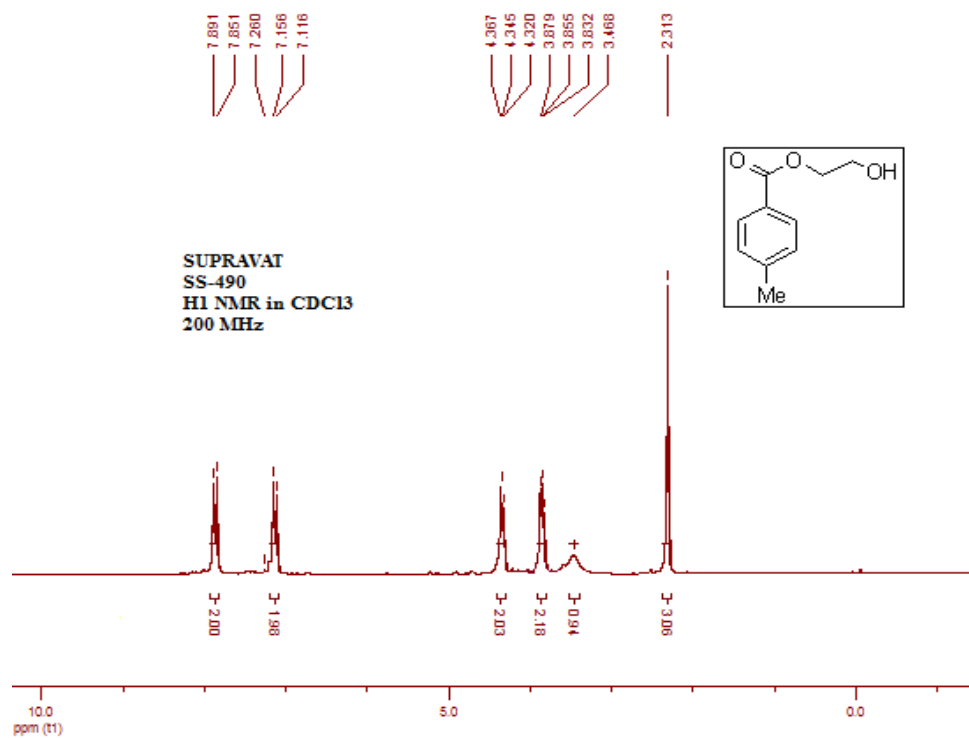

$^1\text{H}$  NMR of **5f**

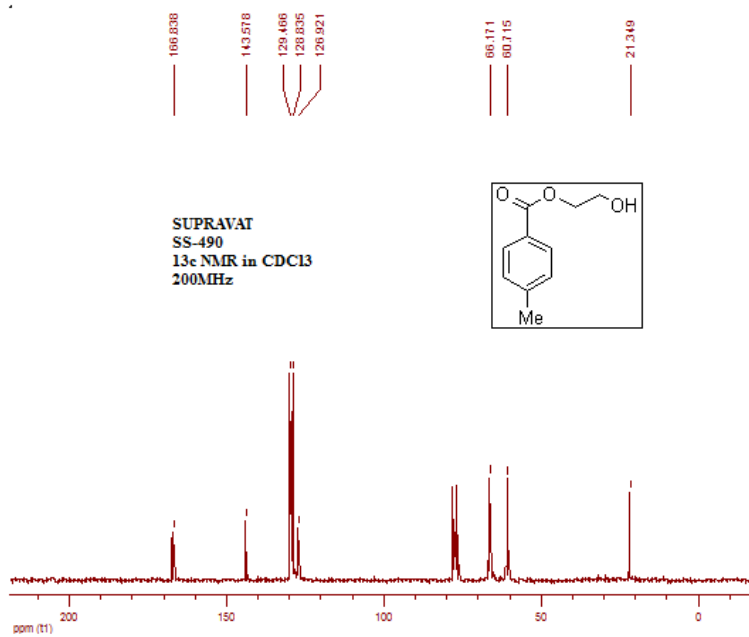

$^{13}\text{C}$  NMR of **5f**

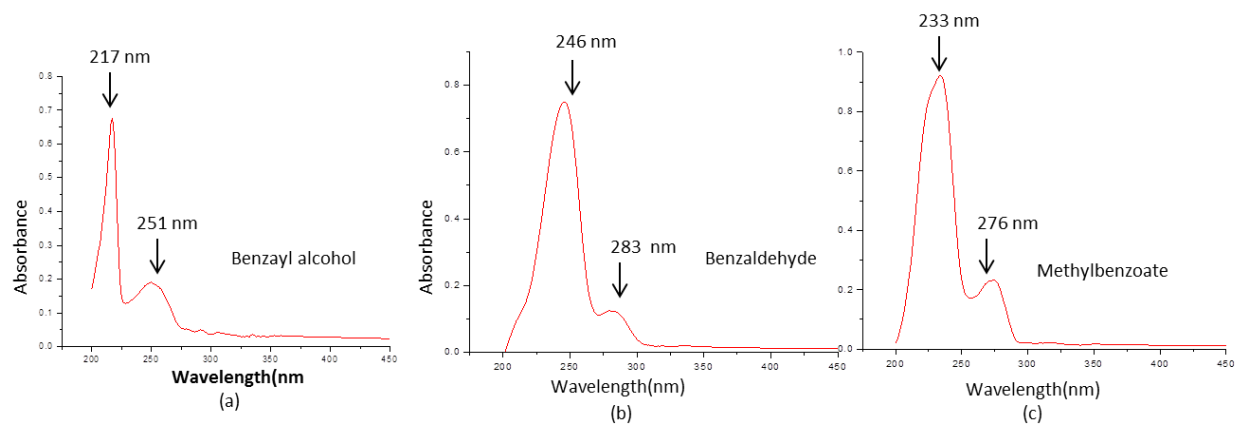

UV-Absorption spectra of (a) Benzyl alcohol, (b) Benzaldehyde and (c) Methylbenzoate in MeOH solvent.
